# Supplementary material for: Description of a Novel Fish Pathogen, Plesiomonas shigelloides subsp. Oncorhynchi, Isolated From Rainbow Trout (Oncorhynchus mykiss): First Genome Analysis and Comparative Genomics
Source: Preprints.org preprint supplement (doi:10.20944/preprints202303.0175.v1), 2023-03-09
Supplement: Supplementary file 2 [file Table S2. ARTS.docx]

Table S2. Antibiotic resistance models detected in the genomes of *Plesiomonas shigelloides* strains by the ARTS server

| **Resistance model ID** | **Model description** | **Genome count** |
| --- | --- | --- |
| PF00044.19 | Gp_dh_N | 19 |
| PF00183.13 | HSP90 | 19 |
| PF00185.19 | OTCace | 19 |
| PF00204.20 | DNA_gyraseB | 19 |
| PF00227.21 | Proteasome | 19 |
| PF00364.17 | Biotin_lipoyl | 19 |
| PF00521.15 | DNA_topoisoIV | 19 |
| PF01039.17 | Carboxyl_trans | 19 |
| PF13599.1 | Pentapeptide_4 | 16 |
| RF0007 | ABC_efflux | 18 |
| RF0044 | CARB-PSE | 18 |
| RF0050 | Chlor_Acetyltrans_CAT | 19 |
| RF0051 | Chlor_Efflux_Pump | 1 |
| RF0053 | ClassA | 1 |
| RF0089 | macB | 13 |
| RF0098 | MexE | 18 |
| RF0099 | MexH | 18 |
| RF0100 | MexW-MexI | 18 |
| RF0104 | MFS_efflux | 6 |
| RF0113 | Qnr | 1 |
| RF0115 | RND_efflux | 18 |
| RF0134 | tet_MFS_efflux | 1 |
| TIGR00663 | TIGR00663 | 18 |
| TIGR02013 | TIGR02013 | 18 |
