# Supplementary material for: Description of a Novel Fish Pathogen, Plesiomonas shigelloides subsp. Oncorhynchi, Isolated From Rainbow Trout (Oncorhynchus mykiss): First Genome Analysis and Comparative Genomics
Source: Preprints.org preprint supplement (doi:10.20944/preprints202303.0175.v1), 2023-03-09
Supplement: Supplementary file 3 [file Table S3. Virulence genes.xlsx]

## Sheet: Common virulence genes
Name
(acfB) accessory colonization factor AcfB [ACF] [Vibrio cholerae O1 biovar El Tor str. N16961]					LS1
(acfB) accessory colonization factor AcfB [ACF] [Vibrio cholerae O1 biovar El Tor str. N16961]					FM82
(acfB) accessory colonization factor AcfB [ACF] [Vibrio cholerae O1 biovar El Tor str. N16961]					CAPA010
(acfB) accessory colonization factor AcfB [ACF] [Vibrio cholerae O1 biovar El Tor str. N16961]					CAPA003
(acfB) accessory colonization factor AcfB [ACF] [Vibrio cholerae O1 biovar El Tor str. N16961]					V78
(acfB) accessory colonization factor AcfB [ACF] [Vibrio cholerae O1 biovar El Tor str. N16961]					MS17-188
(acfB) accessory colonization factor AcfB [ACF] [Vibrio cholerae O1 biovar El Tor str. N16961]					7A
(algW) AlgW protein [Alginate regulation] [Pseudomonas aeruginosa PAO1]					Zfcc051
(algW) AlgW protein [Alginate regulation] [Pseudomonas aeruginosa PAO1]					FDAARGOS_725
(algW) AlgW protein [Alginate regulation] [Pseudomonas aeruginosa PAO1]					Colony 20
(cap8G) capsular polysaccharide synthesis enzyme Cap8G [Capsule] [Staphylococcus aureus subsp. aureus MW2]					Colony 13
(ccmC) cytochrome c-type biogenesis protein CcmC, putative heme lyase for CcmE [CcmC] [Legionella pneumophila subsp. pneumophila str. Philadelphia 1]					NCTC10363
(ccmC) cytochrome c-type biogenesis protein CcmC, putative heme lyase for CcmE [CcmC] [Legionella pneumophila subsp. pneumophila str. Philadelphia 1]					MD22D9
(ccmC) cytochrome c-type biogenesis protein CcmC, putative heme lyase for CcmE [CcmC] [Legionella pneumophila subsp. pneumophila str. Philadelphia 1]					GT4
(ccmC) cytochrome c-type biogenesis protein CcmC, putative heme lyase for CcmE [CcmC] [Legionella pneumophila subsp. pneumophila str. Philadelphia 1]					NCTC10364
(ccmC) cytochrome c-type biogenesis protein CcmC, putative heme lyase for CcmE [CcmC] [Legionella pneumophila subsp. pneumophila str. Philadelphia 1]					GN7
(ccmC) cytochrome c-type biogenesis protein CcmC, putative heme lyase for CcmE [CcmC] [Legionella pneumophila subsp. pneumophila str. Philadelphia 1]					NCTC10360
(ccmC) cytochrome c-type biogenesis protein CcmC, putative heme lyase for CcmE [CcmC] [Legionella pneumophila subsp. pneumophila str. Philadelphia 1]					P5462
(ccmC) cytochrome c-type biogenesis protein CcmC, putative heme lyase for CcmE [CcmC] [Legionella pneumophila subsp. pneumophila str. Philadelphia 1]					302-73
(ccmC) cytochrome c-type biogenesis protein CcmC, putative heme lyase for CcmE [CcmC] [Legionella pneumophila subsp. pneumophila str. Philadelphia 1]
(ccmC) cytochrome c-type biogenesis protein CcmC, putative heme lyase for CcmE [CcmC] [Legionella pneumophila subsp. pneumophila str. Philadelphia 1]
(ccmC) cytochrome c-type biogenesis protein CcmC, putative heme lyase for CcmE [CcmC] [Legionella pneumophila subsp. pneumophila str. Philadelphia 1]
(ccmC) cytochrome c-type biogenesis protein CcmC, putative heme lyase for CcmE [CcmC] [Legionella pneumophila subsp. pneumophila str. Philadelphia 1]
(ccmC) cytochrome c-type biogenesis protein CcmC, putative heme lyase for CcmE [CcmC] [Legionella pneumophila subsp. pneumophila str. Philadelphia 1]
(ccmC) cytochrome c-type biogenesis protein CcmC, putative heme lyase for CcmE [CcmC] [Legionella pneumophila subsp. pneumophila str. Philadelphia 1]
(ccmC) cytochrome c-type biogenesis protein CcmC, putative heme lyase for CcmE [CcmC] [Legionella pneumophila subsp. pneumophila str. Philadelphia 1]
(ccmC) cytochrome c-type biogenesis protein CcmC, putative heme lyase for CcmE [CcmC] [Legionella pneumophila subsp. pneumophila str. Philadelphia 1]
(ccmF) cytochrome c heme lyase subunit CcmF [Cytochrome c muturation (ccm) locus] [Legionella pneumophila subsp. pneumophila str. Philadelphia 1]
(ccmF) cytochrome c heme lyase subunit CcmF [Cytochrome c muturation (ccm) locus] [Legionella pneumophila subsp. pneumophila str. Philadelphia 1]
(ccmF) cytochrome c heme lyase subunit CcmF [Cytochrome c muturation (ccm) locus] [Legionella pneumophila subsp. pneumophila str. Philadelphia 1]
(cdsV) Type III secretion protein CdsV [TTSS] [Chlamydia trachomatis D/UW-3/CX]
(cdsV) Type III secretion protein CdsV [TTSS] [Chlamydia trachomatis D/UW-3/CX]
(cdsV) Type III secretion protein CdsV [TTSS] [Chlamydia trachomatis D/UW-3/CX]
(cdsV) Type III secretion protein CdsV [TTSS] [Chlamydia trachomatis D/UW-3/CX]
(cdsV) Type III secretion protein CdsV [TTSS] [Chlamydia trachomatis D/UW-3/CX]
(cgs) cyclic beta 1-2 glucan synthetase [CG] [Brucella melitensis bv. 1 str. 16M]
(cheD) methyl-accepting chemotaxis protein CheD [peritrichous flagella] [Yersinia enterocolitica subsp. enterocolitica 8081]
(cheD) methyl-accepting chemotaxis protein CheD [peritrichous flagella] [Yersinia enterocolitica subsp. enterocolitica 8081]
(cheD) methyl-accepting chemotaxis protein CheD [peritrichous flagella] [Yersinia enterocolitica subsp. enterocolitica 8081]
(cheD) methyl-accepting chemotaxis protein CheD [peritrichous flagella] [Yersinia enterocolitica subsp. enterocolitica 8081]
(cheD) methyl-accepting chemotaxis protein CheD [peritrichous flagella] [Yersinia enterocolitica subsp. enterocolitica 8081]
(cheD) methyl-accepting chemotaxis protein CheD [peritrichous flagella] [Yersinia enterocolitica subsp. enterocolitica 8081]
(cheD) methyl-accepting chemotaxis protein CheD [peritrichous flagella] [Yersinia enterocolitica subsp. enterocolitica 8081]
(cheD) methyl-accepting chemotaxis protein CheD [peritrichous flagella] [Yersinia enterocolitica subsp. enterocolitica 8081]
(cheD) methyl-accepting chemotaxis protein CheD [peritrichous flagella] [Yersinia enterocolitica subsp. enterocolitica 8081]
(cheD) methyl-accepting chemotaxis protein CheD [peritrichous flagella] [Yersinia enterocolitica subsp. enterocolitica 8081]
(cheD) methyl-accepting chemotaxis protein CheD [peritrichous flagella] [Yersinia enterocolitica subsp. enterocolitica 8081]
(cheD) methyl-accepting chemotaxis protein CheD [peritrichous flagella] [Yersinia enterocolitica subsp. enterocolitica 8081]
(cheD) methyl-accepting chemotaxis protein CheD [peritrichous flagella] [Yersinia enterocolitica subsp. enterocolitica 8081]
(cheD) methyl-accepting chemotaxis protein CheD [peritrichous flagella] [Yersinia enterocolitica subsp. enterocolitica 8081]
(cheD) methyl-accepting chemotaxis protein CheD [peritrichous flagella] [Yersinia enterocolitica subsp. enterocolitica 8081]
(cheD) methyl-accepting chemotaxis protein CheD [peritrichous flagella] [Yersinia enterocolitica subsp. enterocolitica 8081]
(cheD) methyl-accepting chemotaxis protein CheD [peritrichous flagella] [Yersinia enterocolitica subsp. enterocolitica 8081]
(cheD) methyl-accepting chemotaxis protein CheD [peritrichous flagella] [Yersinia enterocolitica subsp. enterocolitica 8081]
(cheD) methyl-accepting chemotaxis protein CheD [peritrichous flagella] [Yersinia enterocolitica subsp. enterocolitica 8081]
(cheV3) chemotaxis coupling protein CheV3 [Pse5Ac7Ac] [Helicobacter pylori 26695]
(cheV3) chemotaxis coupling protein CheV3 [Pse5Ac7Ac] [Helicobacter pylori 26695]
(cheV3) chemotaxis coupling protein CheV3 [Pse5Ac7Ac] [Helicobacter pylori 26695]
(cheV3) chemotaxis coupling protein CheV3 [Pse5Ac7Ac] [Helicobacter pylori 26695]
(cheV3) chemotaxis coupling protein CheV3 [Pse5Ac7Ac] [Helicobacter pylori 26695]
(clpB/vasG) type VI secretion system AAA+ family ATPase [T6SS] [Vibrio cholerae O1 biovar El Tor str. N16961]
(clpB/vasG) type VI secretion system AAA+ family ATPase [T6SS] [Vibrio cholerae O1 biovar El Tor str. N16961]
(clpB/vasG) type VI secretion system AAA+ family ATPase [T6SS] [Vibrio cholerae O1 biovar El Tor str. N16961]
(clpB/vasG) type VI secretion system AAA+ family ATPase [T6SS] [Vibrio cholerae O1 biovar El Tor str. N16961]
(clpB/vasG) type VI secretion system AAA+ family ATPase [T6SS] [Vibrio cholerae O1 biovar El Tor str. N16961]
(clpB/vasG) type VI secretion system AAA+ family ATPase [T6SS] [Vibrio cholerae O1 biovar El Tor str. N16961]
(clpB/vasG) type VI secretion system AAA+ family ATPase [T6SS] [Vibrio cholerae O1 biovar El Tor str. N16961]
(clpB/vasG) type VI secretion system AAA+ family ATPase [T6SS] [Vibrio cholerae O1 biovar El Tor str. N16961]
(clpB/vasG) type VI secretion system AAA+ family ATPase [T6SS] [Vibrio cholerae O1 biovar El Tor str. N16961]
(clpB/vasG) type VI secretion system AAA+ family ATPase [T6SS] [Vibrio cholerae O1 biovar El Tor str. N16961]
(clpB/vasG) type VI secretion system AAA+ family ATPase [T6SS] [Vibrio cholerae O1 biovar El Tor str. N16961]
(clpB/vasG) type VI secretion system AAA+ family ATPase [T6SS] [Vibrio cholerae O1 biovar El Tor str. N16961]
(clpB/vasG) type VI secretion system AAA+ family ATPase [T6SS] [Vibrio cholerae O1 biovar El Tor str. N16961]
(clpB/vasG) type VI secretion system AAA+ family ATPase [T6SS] [Vibrio cholerae O1 biovar El Tor str. N16961]
(clpC) endopeptidase Clp ATP-binding chain C [ClpC] [Listeria monocytogenes EGD-e]
(clpC) endopeptidase Clp ATP-binding chain C [ClpC] [Listeria monocytogenes EGD-e]
(clpC) endopeptidase Clp ATP-binding chain C [ClpC] [Listeria monocytogenes EGD-e]
(clpC) endopeptidase Clp ATP-binding chain C [ClpC] [Listeria monocytogenes EGD-e]
(clpC) endopeptidase Clp ATP-binding chain C [ClpC] [Listeria monocytogenes EGD-e]
(clpC) endopeptidase Clp ATP-binding chain C [ClpC] [Listeria monocytogenes EGD-e]
(clpC) endopeptidase Clp ATP-binding chain C [ClpC] [Listeria monocytogenes EGD-e]
(clpC) endopeptidase Clp ATP-binding chain C [ClpC] [Listeria monocytogenes EGD-e]
(clpC) endopeptidase Clp ATP-binding chain C [ClpC] [Listeria monocytogenes EGD-e]
(cps4J) capsular polysaccharide biosynthesis protein Cps4J [Capsule] [Streptococcus pneumoniae TIGR4]
(csgG) curli production assembly/transport protein CsgG [Agf] [Salmonella enterica subsp. enterica serovar Typhimurium str. LT2]
(csgG) curli production assembly/transport protein CsgG [Agf] [Salmonella enterica subsp. enterica serovar Typhimurium str. LT2]
(fbpC) iron(III) ABC transporter, ATP-binding protein [FbpABC] [Neisseria meningitidis MC58]
(fcl) GDP-fucose synthetase [O-antigen] [Yersinia enterocolitica subsp. enterocolitica 8081]
(fcl) GDP-fucose synthetase [O-antigen] [Yersinia enterocolitica subsp. enterocolitica 8081]
(fleQ) transcriptional regulator FleQ [polar flagella] [Legionella pneumophila subsp. pneumophila str. Philadelphia 1]
(fleQ) transcriptional regulator FleQ [polar flagella] [Legionella pneumophila subsp. pneumophila str. Philadelphia 1]
(fleQ) transcriptional regulator FleQ [polar flagella] [Legionella pneumophila subsp. pneumophila str. Philadelphia 1]
(flgG) flagellar basal-body rod protein FlgG [Flagella] [Pseudomonas aeruginosa PAO1]
(flgG) flagellar basal-body rod protein FlgG [Flagella] [Pseudomonas aeruginosa PAO1]
(flgI) flagellar P-ring protein precursor FlgI [Flagella] [Pseudomonas aeruginosa PAO1]
(flgI) flagellar P-ring protein precursor FlgI [Flagella] [Pseudomonas aeruginosa PAO1]
(flgR) sigma-54 associated transcriptional activator [Pse5Ac7Ac, Pse5Ac7Am, Pse8OAc, Pse5Am7AcGlnAc] [Campylobacter jejuni subsp. jejuni NCTC 11168]
(flhA) flagellar biosynthesis protein FlhA [Flagella] [Burkholderia pseudomallei K96243]
(flhA) flagellar biosynthesis protein FlhA [Flagella] [Burkholderia pseudomallei K96243]
(flhA) flagellar biosynthesis protein FlhA [Flagella] [Burkholderia pseudomallei K96243]
(flhA) flagellar biosynthesis protein FlhA [Flagella] [Pseudomonas aeruginosa PAO1]
(flhA) flagellar biosynthesis protein FlhA [Flagella] [Pseudomonas aeruginosa PAO1]
(flhA) flagellar biosynthesis protein FlhA [Flagella] [Yersinia enterocolitica subsp. enterocolitica 8081]
(flhA) flagellar biosynthesis protein FlhA [Flagella] [Yersinia enterocolitica subsp. enterocolitica 8081]
(flhA) flagellar biosynthesis protein FlhA [Flagella] [Yersinia enterocolitica subsp. enterocolitica 8081]
(flhA) flagellar biosynthesis protein FlhA [Flagella] [Yersinia enterocolitica subsp. enterocolitica 8081]
(flhA) flagellar biosynthesis protein FlhA [Flagella] [Yersinia enterocolitica subsp. enterocolitica 8081]
(flhA) flagellar biosynthesis protein FlhA [Flagella] [Yersinia enterocolitica subsp. enterocolitica 8081]
(flhA) flagellar biosynthesis protein FlhA [Flagella] [Yersinia enterocolitica subsp. enterocolitica 8081]
(flhA) flagellar biosynthesis protein FlhA [Flagella] [Yersinia enterocolitica subsp. enterocolitica 8081]
(flhA) flagellar biosynthesis protein FlhA [Flagella] [Yersinia enterocolitica subsp. enterocolitica 8081]
(flhA) flagellar biosynthesis protein FlhA [Flagella] [Yersinia enterocolitica subsp. enterocolitica 8081]
(flhA) flagellar biosynthesis protein FlhA [Flagella] [Yersinia enterocolitica subsp. enterocolitica 8081]
(flhA) flagellar biosynthesis protein FlhA [Flagella] [Yersinia enterocolitica subsp. enterocolitica 8081]
(flhA) flagellar biosynthesis protein FlhA [Flagella] [Yersinia enterocolitica subsp. enterocolitica 8081]
(flhA) flagellar biosynthesis protein FlhA [Flagella] [Yersinia enterocolitica subsp. enterocolitica 8081]
(flhA) flagellar biosynthesis protein FlhA [Flagella] [Yersinia enterocolitica subsp. enterocolitica 8081]
(fliC) B-type flagellin [Flagella] [Pseudomonas aeruginosa PAO1]
(fliC) B-type flagellin [Flagella] [Pseudomonas aeruginosa PAO1]
(fliC) B-type flagellin [Flagella] [Pseudomonas aeruginosa PAO1]
(fliC) flagellin [Flagella] [Yersinia enterocolitica subsp. enterocolitica 8081]
(fliC) flagellin [Flagella] [Yersinia enterocolitica subsp. enterocolitica 8081]
(fliC) flagellin [Flagella] [Yersinia enterocolitica subsp. enterocolitica 8081]
(fliC) flagellin [Flagella] [Yersinia enterocolitica subsp. enterocolitica 8081]
(fliC) flagellin [Flagella] [Yersinia enterocolitica subsp. enterocolitica 8081]
(fliC) flagellin [Flagella] [Yersinia enterocolitica subsp. enterocolitica 8081]
(fliC) flagellin [Flagella] [Yersinia enterocolitica subsp. enterocolitica 8081]
(fliC) flagellin [Flagella] [Yersinia enterocolitica subsp. enterocolitica 8081]
(fliC) flagellin [Flagella] [Yersinia enterocolitica subsp. enterocolitica 8081]
(fliC) flagellin [Flagella] [Yersinia enterocolitica subsp. enterocolitica 8081]
(fliC) flagellin [Flagella] [Yersinia enterocolitica subsp. enterocolitica 8081]
(fliC) flagellin [Flagella] [Yersinia enterocolitica subsp. enterocolitica 8081]
(fliC) flagellin [Flagella] [Yersinia enterocolitica subsp. enterocolitica 8081]
(fliC) flagellin [Flagella] [Yersinia enterocolitica subsp. enterocolitica 8081]
(fliC) flagellin [Flagella] [Yersinia enterocolitica subsp. enterocolitica 8081]
(fliI) flagellum-specific ATP synthase FliI [Flagella] [Pseudomonas aeruginosa PAO1]
(fliI) flagellum-specific ATP synthase FliI [Flagella] [Yersinia enterocolitica subsp. enterocolitica 8081]
(fliI) flagellum-specific ATP synthase FliI [Flagella] [Yersinia enterocolitica subsp. enterocolitica 8081]
(fliI) flagellum-specific ATP synthase FliI [Flagella] [Yersinia enterocolitica subsp. enterocolitica 8081]
(fliI) flagellum-specific ATP synthase FliI [Flagella] [Yersinia enterocolitica subsp. enterocolitica 8081]
(fliI) flagellum-specific ATP synthase FliI [Flagella] [Yersinia enterocolitica subsp. enterocolitica 8081]
(fliI) flagellum-specific ATP synthase FliI [Flagella] [Yersinia enterocolitica subsp. enterocolitica 8081]
(fliI) flagellum-specific ATP synthase FliI [Flagella] [Yersinia enterocolitica subsp. enterocolitica 8081]
(fliI) flagellum-specific ATP synthase FliI [Flagella] [Yersinia enterocolitica subsp. enterocolitica 8081]
(fliI) flagellum-specific ATP synthase FliI [Flagella] [Yersinia enterocolitica subsp. enterocolitica 8081]
(fliI) flagellum-specific ATP synthase FliI [Flagella] [Yersinia enterocolitica subsp. enterocolitica 8081]
(fliI) flagellum-specific ATP synthase FliI [Flagella] [Yersinia enterocolitica subsp. enterocolitica 8081]
(fliI) flagellum-specific ATP synthase FliI [Flagella] [Yersinia enterocolitica subsp. enterocolitica 8081]
(fliI) flagellum-specific ATP synthase FliI [Flagella] [Yersinia enterocolitica subsp. enterocolitica 8081]
(fliI) flagellum-specific ATP synthase FliI [Flagella] [Yersinia enterocolitica subsp. enterocolitica 8081]
(fliI) flagellum-specific ATP synthase FliI [Flagella] [Yersinia enterocolitica subsp. enterocolitica 8081]
(fliI) flagellum-specific ATP synthase FliI [Flagella] [Yersinia enterocolitica subsp. enterocolitica 8081]
(fliI) flagellum-specific ATP synthase FliI [Flagella] [Yersinia enterocolitica subsp. enterocolitica 8081]
(fliI) flagellum-specific ATP synthase FliI [Flagella] [Yersinia enterocolitica subsp. enterocolitica 8081]
(fliM) flagellar motor switch protein FliM [Flagella] [Pseudomonas aeruginosa PAO1]
(fliM) flagellar motor switch protein FliM [Flagella] [Pseudomonas aeruginosa PAO1]
(fliM) flagellar motor switch protein FliM [Flagella] [Pseudomonas aeruginosa PAO1]
(fliM) flagellar motor switch protein FliM [Flagella] [Pseudomonas aeruginosa PAO1]
(fliM) flagellar motor switch protein FliM [Flagella] [Pseudomonas aeruginosa PAO1]
(fliM) flagellar motor switch protein FliM [Flagella] [Pseudomonas aeruginosa PAO1]
(fliM) flagellar motor switch protein FliM [Flagella] [Pseudomonas aeruginosa PAO1]
(fliM) flagellar motor switch protein FliM [Flagella] [Pseudomonas aeruginosa PAO1]
(fliM) flagellar motor switch protein FliM [Flagella] [Pseudomonas aeruginosa PAO1]
(fliM) flagellar motor switch protein FliM [Flagella] [Pseudomonas aeruginosa PAO1]
(fliM) flagellar motor switch protein FliM [Flagella] [Pseudomonas aeruginosa PAO1]
(fliM) flagellar motor switch protein FliM [Flagella] [Pseudomonas aeruginosa PAO1]
(fliM) flagellar motor switch protein FliM [Flagella] [Pseudomonas aeruginosa PAO1]
(fliM) flagellar motor switch protein FliM [Flagella] [Pseudomonas aeruginosa PAO1]
(fliM) flagellar motor switch protein FliM [Flagella] [Pseudomonas aeruginosa PAO1]
(fliM) flagellar motor switch protein FliM [Flagella] [Pseudomonas aeruginosa PAO1]
(fliM) flagellar motor switch protein FliM [Flagella] [Pseudomonas aeruginosa PAO1]
(fliM) flagellar motor switch protein FliM [Flagella] [Pseudomonas aeruginosa PAO1]
(fliN) flagellar motor switch protein FliN [Flagella] [Burkholderia pseudomallei K96243]
(fliN) flagellar motor switch protein FliN [Flagella] [Burkholderia pseudomallei K96243]
(fliN) flagellar motor switch protein FliN [Flagella] [Burkholderia pseudomallei K96243]
(fliN) flagellar motor switch protein FliN [Flagella] [Burkholderia pseudomallei K96243]
(fliN) flagellar motor switch protein FliN [Flagella] [Burkholderia pseudomallei K96243]
(fliN) flagellar motor switch protein FliN [Flagella] [Burkholderia pseudomallei K96243]
(fliN) flagellar motor switch protein FliN [Flagella] [Burkholderia pseudomallei K96243]
(fliN) flagellar motor switch protein FliN [Flagella] [Burkholderia pseudomallei K96243]
(fliN) flagellar motor switch protein FliN [Flagella] [Burkholderia pseudomallei K96243]
(fliN) flagellar motor switch protein FliN [Flagella] [Burkholderia pseudomallei K96243]
(fliN) flagellar motor switch protein FliN [Flagella] [Burkholderia pseudomallei K96243]
(fliN) flagellar motor switch protein FliN [Flagella] [Burkholderia pseudomallei K96243]
(fliN) flagellar motor switch protein FliN [Flagella] [Burkholderia pseudomallei K96243]
(fliN) flagellar motor switch protein FliN [Flagella] [Burkholderia pseudomallei K96243]
(fliN) flagellar motor switch protein FliN [Flagella] [Burkholderia pseudomallei K96243]
(fliN) flagellar motor switch protein FliN [Flagella] [Burkholderia pseudomallei K96243]
(fliN) flagellar motor switch protein FliN [Flagella] [Burkholderia pseudomallei K96243]
(fliN) flagellar motor switch protein FliN [Flagella] [Burkholderia pseudomallei K96243]
(fliN) flagellar motor switch protein FliN [Flagella] [Burkholderia pseudomallei K96243]
(fliP) flagellar biosynthetic protein FliP [Flagella] [Legionella pneumophila subsp. pneumophila str. Philadelphia 1]
(fliP) flagellar biosynthetic protein FliP [Flagella] [Pseudomonas aeruginosa PAO1]
(fliP) flagellar biosynthetic protein FliP [Flagella] [Pseudomonas aeruginosa PAO1]
(fliP) flagellar biosynthetic protein FliP [Flagella] [Pseudomonas aeruginosa PAO1]
(fliP) flagellar biosynthetic protein FliP [Flagella] [Pseudomonas aeruginosa PAO1]
(fliP) flagellar biosynthetic protein FliP [Flagella] [Pseudomonas aeruginosa PAO1]
(fliP) flagellar biosynthetic protein FliP [Flagella] [Pseudomonas aeruginosa PAO1]
(fliP) flagellar biosynthetic protein FliP [Flagella] [Pseudomonas aeruginosa PAO1]
(fliP) flagellar biosynthetic protein FliP [Flagella] [Pseudomonas aeruginosa PAO1]
(fliP) flagellar biosynthetic protein FliP [Flagella] [Pseudomonas aeruginosa PAO1]
(fliP) flagellar biosynthetic protein FliP [Flagella] [Yersinia enterocolitica subsp. enterocolitica 8081]
(fliP) flagellar biosynthetic protein FliP [Flagella] [Yersinia enterocolitica subsp. enterocolitica 8081]
(fliP) flagellar biosynthetic protein FliP [Flagella] [Yersinia enterocolitica subsp. enterocolitica 8081]
(fliP) flagellar biosynthetic protein FliP [Flagella] [Yersinia enterocolitica subsp. enterocolitica 8081]
(fliP) flagellar biosynthetic protein FliP [Flagella] [Yersinia enterocolitica subsp. enterocolitica 8081]
(fliP) flagellar biosynthetic protein FliP [Flagella] [Yersinia enterocolitica subsp. enterocolitica 8081]
(fliP) flagellar biosynthetic protein FliP [Flagella] [Yersinia enterocolitica subsp. enterocolitica 8081]
(fliP) flagellar biosynthetic protein FliP [Flagella] [Yersinia enterocolitica subsp. enterocolitica 8081]
(fliP) flagellar biosynthetic protein FliP [Flagella] [Yersinia enterocolitica subsp. enterocolitica 8081]
(fliQ) flagellar biosynthetic protein FliQ [Flagella] [Pseudomonas aeruginosa PAO1]
(fliQ) flagellar biosynthetic protein FliQ [Flagella] [Pseudomonas aeruginosa PAO1]
(fliQ) flagellar biosynthetic protein FliQ [Flagella] [Pseudomonas aeruginosa PAO1]
(fliQ) flagellar biosynthetic protein FliQ [Flagella] [Pseudomonas aeruginosa PAO1]
(fliQ) flagellar biosynthetic protein FliQ [Flagella] [Pseudomonas aeruginosa PAO1]
(fliQ) flagellar biosynthetic protein FliQ [Flagella] [Pseudomonas aeruginosa PAO1]
(fliQ) flagellar biosynthetic protein FliQ [Flagella] [Pseudomonas aeruginosa PAO1]
(fliQ) flagellar biosynthetic protein FliQ [Flagella] [Pseudomonas aeruginosa PAO1]
(fliQ) flagellar biosynthetic protein FliQ [Flagella] [Pseudomonas aeruginosa PAO1]
(fliQ) flagellar biosynthetic protein FliQ [Flagella] [Pseudomonas aeruginosa PAO1]
(fliQ) flagellar biosynthetic protein FliQ [Flagella] [Pseudomonas aeruginosa PAO1]
(fliQ) flagellar biosynthetic protein FliQ [Flagella] [Pseudomonas aeruginosa PAO1]
(fliQ) flagellar biosynthetic protein FliQ [Flagella] [Pseudomonas aeruginosa PAO1]
(fliQ) flagellar biosynthetic protein FliQ [Flagella] [Pseudomonas aeruginosa PAO1]
(fliQ) flagellar biosynthetic protein FliQ [Flagella] [Pseudomonas aeruginosa PAO1]
(fliQ) flagellar biosynthetic protein FliQ [Flagella] [Pseudomonas aeruginosa PAO1]
(fliQ) flagellar biosynthetic protein FliQ [Flagella] [Pseudomonas aeruginosa PAO1]
(fliQ) flagellar biosynthetic protein FliQ [Flagella] [Pseudomonas aeruginosa PAO1]
(fliR) flagellar biosynthetic protein FliR [Flagella] [Pseudomonas aeruginosa PAO1]
(fliR) flagellar biosynthetic protein FliR [Flagella] [Pseudomonas aeruginosa PAO1]
(fliR) flagellar biosynthetic protein FliR [Flagella] [Pseudomonas aeruginosa PAO1]
(fliR) flagellar biosynthetic protein FliR [Flagella] [Pseudomonas aeruginosa PAO1]
(fliR) flagellar biosynthetic protein FliR [Flagella] [Pseudomonas aeruginosa PAO1]
(fliR) flagellar biosynthetic protein FliR [Flagella] [Pseudomonas aeruginosa PAO1]
(fliR) flagellar biosynthetic protein FliR [Flagella] [Pseudomonas aeruginosa PAO1]
(galE) UDP-glucose 4-epimerase [LOS] [Haemophilus influenzae Rd KW20]
(galE) UDP-glucose 4-epimerase [LOS] [Haemophilus influenzae Rd KW20]
(galE) UDP-glucose 4-epimerase [LOS] [Haemophilus influenzae Rd KW20]
(galU) glucosephosphate uridylyltransferase [LOS] [Haemophilus influenzae Rd KW20]
(gmd) GDP-mannose 4,6-dehydratase [LPS] [Brucella melitensis bv. 1 str. 16M]
(gmd) GDP-mannose 4,6-dehydratase [O-antigen] [Yersinia enterocolitica subsp. enterocolitica 8081]
(gmd) GDP-mannose 4,6-dehydratase [O-antigen] [Yersinia enterocolitica subsp. enterocolitica 8081]
(gmhA/lpcA) phosphoheptose isomerase [LOS] [Haemophilus influenzae Rd KW20]
(gmhA/lpcA) phosphoheptose isomerase [LOS] [Haemophilus influenzae Rd KW20]
(gmhA/lpcA) phosphoheptose isomerase [LOS] [Haemophilus influenzae Rd KW20]
(gmhA/lpcA) phosphoheptose isomerase [LOS] [Haemophilus influenzae Rd KW20]
(gmhA/lpcA) phosphoheptose isomerase [LOS] [Haemophilus influenzae Rd KW20]
(gmhA/lpcA) phosphoheptose isomerase [LOS] [Haemophilus influenzae Rd KW20]
(gmhA/lpcA) phosphoheptose isomerase [LOS] [Haemophilus influenzae Rd KW20]
(gmhA/lpcA) phosphoheptose isomerase [LOS] [Haemophilus influenzae Rd KW20]
(gmhA/lpcA) phosphoheptose isomerase [LOS] [Haemophilus influenzae Rd KW20]
(gmhA/lpcA) phosphoheptose isomerase [LOS] [Haemophilus influenzae Rd KW20]
(gmhA/lpcA) phosphoheptose isomerase [LOS] [Haemophilus influenzae Rd KW20]
(gmhA/lpcA) phosphoheptose isomerase [LOS] [Haemophilus influenzae Rd KW20]
(gmhA/lpcA) phosphoheptose isomerase [LOS] [Haemophilus influenzae Rd KW20]
(gmhA/lpcA) phosphoheptose isomerase [LOS] [Haemophilus influenzae Rd KW20]
(gmhA/lpcA) phosphoheptose isomerase [LOS] [Haemophilus influenzae Rd KW20]
(gmhA/lpcA) phosphoheptose isomerase [LOS] [Haemophilus influenzae Rd KW20]
(gmhA/lpcA) phosphoheptose isomerase [LOS] [Haemophilus influenzae Rd KW20]
(gmhA/lpcA) phosphoheptose isomerase [LOS] [Haemophilus influenzae Rd KW20]
(gmhA/lpcA) phosphoheptose isomerase [LOS] [Haemophilus influenzae Rd KW20]
(gspD) general secretion pathway protein D [T2SS] [Shigella dysenteriae Sd197]
(gspD) general secretion pathway protein D [T2SS] [Shigella dysenteriae Sd197]
(gspD) general secretion pathway protein D [T2SS] [Shigella dysenteriae Sd197]
(gspD) general secretion pathway protein D [T2SS] [Shigella dysenteriae Sd197]
(gspD) general secretion pathway protein D [T2SS] [Shigella dysenteriae Sd197]
(gspD) general secretion pathway protein D [T2SS] [Shigella dysenteriae Sd197]
(gspD) general secretion pathway protein D [T2SS] [Shigella dysenteriae Sd197]
(gspD) general secretion pathway protein D [T2SS] [Shigella dysenteriae Sd197]
(gspD) general secretion pathway protein D [T2SS] [Shigella dysenteriae Sd197]
(gspD) general secretion pathway protein D [T2SS] [Shigella dysenteriae Sd197]
(gspD) general secretion pathway protein D [T2SS] [Shigella dysenteriae Sd197]
(gspD) general secretion pathway protein D [T2SS] [Shigella dysenteriae Sd197]
(gspD) general secretion pathway protein D [T2SS] [Shigella dysenteriae Sd197]
(gspD) general secretion pathway protein D [T2SS] [Shigella dysenteriae Sd197]
(gspD) general secretion pathway protein D [T2SS] [Shigella dysenteriae Sd197]
(gspD) general secretion pathway protein D [T2SS] [Shigella dysenteriae Sd197]
(gspD) general secretion pathway protein D [T2SS] [Shigella dysenteriae Sd197]
(gspD) general secretion pathway protein D [T2SS] [Shigella dysenteriae Sd197]
(gspD) general secretion pathway protein D [T2SS] [Shigella dysenteriae Sd197]
(gspE) general secretion pathway protein E [T2SS] [Shigella dysenteriae Sd197]
(gspE) general secretion pathway protein E [T2SS] [Shigella dysenteriae Sd197]
(gspE) general secretion pathway protein E [T2SS] [Shigella dysenteriae Sd197]
(gspE) general secretion pathway protein E [T2SS] [Shigella dysenteriae Sd197]
(gspE) general secretion pathway protein E [T2SS] [Shigella dysenteriae Sd197]
(gspE) general secretion pathway protein E [T2SS] [Shigella dysenteriae Sd197]
(gspE) general secretion pathway protein E [T2SS] [Shigella dysenteriae Sd197]
(gspE) general secretion pathway protein E [T2SS] [Shigella dysenteriae Sd197]
(gspE) general secretion pathway protein E [T2SS] [Shigella dysenteriae Sd197]
(gspE) general secretion pathway protein E [T2SS] [Shigella dysenteriae Sd197]
(gspE) general secretion pathway protein E [T2SS] [Shigella dysenteriae Sd197]
(gspE) general secretion pathway protein E [T2SS] [Shigella dysenteriae Sd197]
(gspE) general secretion pathway protein E [T2SS] [Shigella dysenteriae Sd197]
(gspE) general secretion pathway protein E [T2SS] [Shigella dysenteriae Sd197]
(gspE) general secretion pathway protein E [T2SS] [Shigella dysenteriae Sd197]
(gspE) general secretion pathway protein E [T2SS] [Shigella dysenteriae Sd197]
(gspE) general secretion pathway protein E [T2SS] [Shigella dysenteriae Sd197]
(gspE) general secretion pathway protein E [T2SS] [Shigella dysenteriae Sd197]
(gspE) general secretion pathway protein E [T2SS] [Shigella dysenteriae Sd197]
(gspF) general secretion pathway protein F [T2SS] [Shigella dysenteriae Sd197]
(gspF) general secretion pathway protein F [T2SS] [Shigella dysenteriae Sd197]
(gspF) general secretion pathway protein F [T2SS] [Shigella dysenteriae Sd197]
(gspF) general secretion pathway protein F [T2SS] [Shigella dysenteriae Sd197]
(gspF) general secretion pathway protein F [T2SS] [Shigella dysenteriae Sd197]
(gspF) general secretion pathway protein F [T2SS] [Shigella dysenteriae Sd197]
(gspF) general secretion pathway protein F [T2SS] [Shigella dysenteriae Sd197]
(gspF) general secretion pathway protein F [T2SS] [Shigella dysenteriae Sd197]
(gspF) general secretion pathway protein F [T2SS] [Shigella dysenteriae Sd197]
(gspF) general secretion pathway protein F [T2SS] [Shigella dysenteriae Sd197]
(gspF) general secretion pathway protein F [T2SS] [Shigella dysenteriae Sd197]
(gspF) general secretion pathway protein F [T2SS] [Shigella dysenteriae Sd197]
(gspF) general secretion pathway protein F [T2SS] [Shigella dysenteriae Sd197]
(gspF) general secretion pathway protein F [T2SS] [Shigella dysenteriae Sd197]
(gspF) general secretion pathway protein F [T2SS] [Shigella dysenteriae Sd197]
(gspF) general secretion pathway protein F [T2SS] [Shigella dysenteriae Sd197]
(gspF) general secretion pathway protein F [T2SS] [Shigella dysenteriae Sd197]
(gspG) general secretion pathway protein G [T2SS] [Shigella dysenteriae Sd197]
(gspG) general secretion pathway protein G [T2SS] [Shigella dysenteriae Sd197]
(gspG) general secretion pathway protein G [T2SS] [Shigella dysenteriae Sd197]
(gspG) general secretion pathway protein G [T2SS] [Shigella dysenteriae Sd197]
(gspG) general secretion pathway protein G [T2SS] [Shigella dysenteriae Sd197]
(gspG) general secretion pathway protein G [T2SS] [Shigella dysenteriae Sd197]
(gspG) general secretion pathway protein G [T2SS] [Shigella dysenteriae Sd197]
(gspG) general secretion pathway protein G [T2SS] [Shigella dysenteriae Sd197]
(gspG) general secretion pathway protein G [T2SS] [Shigella dysenteriae Sd197]
(gspG) general secretion pathway protein G [T2SS] [Shigella dysenteriae Sd197]
(gspG) general secretion pathway protein G [T2SS] [Shigella dysenteriae Sd197]
(gspG) general secretion pathway protein G [T2SS] [Shigella dysenteriae Sd197]
(gspG) general secretion pathway protein G [T2SS] [Shigella dysenteriae Sd197]
(gspG) general secretion pathway protein G [T2SS] [Shigella dysenteriae Sd197]
(gspG) general secretion pathway protein G [T2SS] [Shigella dysenteriae Sd197]
(gspG) general secretion pathway protein G [T2SS] [Shigella dysenteriae Sd197]
(gspG) general secretion pathway protein G [T2SS] [Shigella dysenteriae Sd197]
(gspG) general secretion pathway protein G [T2SS] [Shigella dysenteriae Sd197]
(gspG) general secretion pathway protein G [T2SS] [Shigella dysenteriae Sd197]
(hcp-2) type VI secretion system substrate Hcp-2 [VAS] [Vibrio cholerae O1 biovar El Tor str. N16961]
(hcp-2) type VI secretion system substrate Hcp-2 [VAS] [Vibrio cholerae O1 biovar El Tor str. N16961]
(hcp-2) type VI secretion system substrate Hcp-2 [VAS] [Vibrio cholerae O1 biovar El Tor str. N16961]
(hcp-2) type VI secretion system substrate Hcp-2 [VAS] [Vibrio cholerae O1 biovar El Tor str. N16961]
(hcp-2) type VI secretion system substrate Hcp-2 [VAS] [Vibrio cholerae O1 biovar El Tor str. N16961]
(hcp-2) type VI secretion system substrate Hcp-2 [VAS] [Vibrio cholerae O1 biovar El Tor str. N16961]
(hcp-2) type VI secretion system substrate Hcp-2 [VAS] [Vibrio cholerae O1 biovar El Tor str. N16961]
(hcp-2) type VI secretion system substrate Hcp-2 [VAS] [Vibrio cholerae O1 biovar El Tor str. N16961]
(hcp-2) type VI secretion system substrate Hcp-2 [VAS] [Vibrio cholerae O1 biovar El Tor str. N16961]
(hcp-2) type VI secretion system substrate Hcp-2 [VAS] [Vibrio cholerae O1 biovar El Tor str. N16961]
(hcp-2) type VI secretion system substrate Hcp-2 [VAS] [Vibrio cholerae O1 biovar El Tor str. N16961]
(hcp-2) type VI secretion system substrate Hcp-2 [VAS] [Vibrio cholerae O1 biovar El Tor str. N16961]
(hcp-2) type VI secretion system substrate Hcp-2 [VAS] [Vibrio cholerae O1 biovar El Tor str. N16961]
(htpB) Hsp60, 60K heat shock protein HtpB [Hsp60] [Legionella pneumophila subsp. pneumophila str. Philadelphia 1]
(htpB) Hsp60, 60K heat shock protein HtpB [Hsp60] [Legionella pneumophila subsp. pneumophila str. Philadelphia 1]
(htpB) Hsp60, 60K heat shock protein HtpB [Hsp60] [Legionella pneumophila subsp. pneumophila str. Philadelphia 1]
(htpB) Hsp60, 60K heat shock protein HtpB [Hsp60] [Legionella pneumophila subsp. pneumophila str. Philadelphia 1]
(htpB) Hsp60, 60K heat shock protein HtpB [Hsp60] [Legionella pneumophila subsp. pneumophila str. Philadelphia 1]
(htpB) Hsp60, 60K heat shock protein HtpB [Hsp60] [Legionella pneumophila subsp. pneumophila str. Philadelphia 1]
(htpB) Hsp60, 60K heat shock protein HtpB [Hsp60] [Legionella pneumophila subsp. pneumophila str. Philadelphia 1]
(htpB) Hsp60, 60K heat shock protein HtpB [Hsp60] [Legionella pneumophila subsp. pneumophila str. Philadelphia 1]
(htpB) Hsp60, 60K heat shock protein HtpB [Hsp60] [Legionella pneumophila subsp. pneumophila str. Philadelphia 1]
(htpB) Hsp60, 60K heat shock protein HtpB [Hsp60] [Legionella pneumophila subsp. pneumophila str. Philadelphia 1]
(htpB) Hsp60, 60K heat shock protein HtpB [Hsp60] [Legionella pneumophila subsp. pneumophila str. Philadelphia 1]
(htpB) Hsp60, 60K heat shock protein HtpB [Hsp60] [Legionella pneumophila subsp. pneumophila str. Philadelphia 1]
(htpB) Hsp60, 60K heat shock protein HtpB [Hsp60] [Legionella pneumophila subsp. pneumophila str. Philadelphia 1]
(htpB) Hsp60, 60K heat shock protein HtpB [Hsp60] [Legionella pneumophila subsp. pneumophila str. Philadelphia 1]
(htpB) Hsp60, 60K heat shock protein HtpB [Hsp60] [Legionella pneumophila subsp. pneumophila str. Philadelphia 1]
(htpB) Hsp60, 60K heat shock protein HtpB [Hsp60] [Legionella pneumophila subsp. pneumophila str. Philadelphia 1]
(htpB) Hsp60, 60K heat shock protein HtpB [Hsp60] [Legionella pneumophila subsp. pneumophila str. Philadelphia 1]
(htpB) Hsp60, 60K heat shock protein HtpB [Hsp60] [Legionella pneumophila subsp. pneumophila str. Philadelphia 1]
(htpB) Hsp60, 60K heat shock protein HtpB [Hsp60] [Legionella pneumophila subsp. pneumophila str. Philadelphia 1]
(IlpA) immunogenic lipoprotein A [IlpA] [Vibrio vulnificus YJ016]
(IlpA) immunogenic lipoprotein A [IlpA] [Vibrio vulnificus YJ016]
(IlpA) immunogenic lipoprotein A [IlpA] [Vibrio vulnificus YJ016]
(IlpA) immunogenic lipoprotein A [IlpA] [Vibrio vulnificus YJ016]
(IlpA) immunogenic lipoprotein A [IlpA] [Vibrio vulnificus YJ016]
(IlpA) immunogenic lipoprotein A [IlpA] [Vibrio vulnificus YJ016]
(IlpA) immunogenic lipoprotein A [IlpA] [Vibrio vulnificus YJ016]
(IlpA) immunogenic lipoprotein A [IlpA] [Vibrio vulnificus YJ016]
(IlpA) immunogenic lipoprotein A [IlpA] [Vibrio vulnificus YJ016]
(IlpA) immunogenic lipoprotein A [IlpA] [Vibrio vulnificus YJ016]
(IlpA) immunogenic lipoprotein A [IlpA] [Vibrio vulnificus YJ016]
(IlpA) immunogenic lipoprotein A [IlpA] [Vibrio vulnificus YJ016]
(IlpA) immunogenic lipoprotein A [IlpA] [Vibrio vulnificus YJ016]
(IlpA) immunogenic lipoprotein A [IlpA] [Vibrio vulnificus YJ016]
(IlpA) immunogenic lipoprotein A [IlpA] [Vibrio vulnificus YJ016]
(IlpA) immunogenic lipoprotein A [IlpA] [Vibrio vulnificus YJ016]
(IlpA) immunogenic lipoprotein A [IlpA] [Vibrio vulnificus YJ016]
(IlpA) immunogenic lipoprotein A [IlpA] [Vibrio vulnificus YJ016]
(IlpA) immunogenic lipoprotein A [IlpA] [Vibrio vulnificus YJ016]
(icl) Isocitrate lyase Icl (isocitrase) (isocitratase) [Isocitrate lyase] [Mycobacterium tuberculosis H37Rv]
(icl) Isocitrate lyase Icl (isocitrase) (isocitratase) [Isocitrate lyase] [Mycobacterium tuberculosis H37Rv]
(icl) Isocitrate lyase Icl (isocitrase) (isocitratase) [Isocitrate lyase] [Mycobacterium tuberculosis H37Rv]
(icl) Isocitrate lyase Icl (isocitrase) (isocitratase) [Isocitrate lyase] [Mycobacterium tuberculosis H37Rv]
(icl) Isocitrate lyase Icl (isocitrase) (isocitratase) [Isocitrate lyase] [Mycobacterium tuberculosis H37Rv]
(icl) Isocitrate lyase Icl (isocitrase) (isocitratase) [Isocitrate lyase] [Mycobacterium tuberculosis H37Rv]
(icl) Isocitrate lyase Icl (isocitrase) (isocitratase) [Isocitrate lyase] [Mycobacterium tuberculosis H37Rv]
(icl) Isocitrate lyase Icl (isocitrase) (isocitratase) [Isocitrate lyase] [Mycobacterium tuberculosis H37Rv]
(icl) Isocitrate lyase Icl (isocitrase) (isocitratase) [Isocitrate lyase] [Mycobacterium tuberculosis H37Rv]
(icl) Isocitrate lyase Icl (isocitrase) (isocitratase) [Isocitrate lyase] [Mycobacterium tuberculosis H37Rv]
(icl) Isocitrate lyase Icl (isocitrase) (isocitratase) [Isocitrate lyase] [Mycobacterium tuberculosis H37Rv]
(icl) Isocitrate lyase Icl (isocitrase) (isocitratase) [Isocitrate lyase] [Mycobacterium tuberculosis H37Rv]
(icl) Isocitrate lyase Icl (isocitrase) (isocitratase) [Isocitrate lyase] [Mycobacterium tuberculosis H37Rv]
(icl) Isocitrate lyase Icl (isocitrase) (isocitratase) [Isocitrate lyase] [Mycobacterium tuberculosis H37Rv]
(katA) catalase [KatA] [Neisseria meningitidis MC58]
(katA) catalase [KatA] [Neisseria meningitidis MC58]
(katA) catalase [KatA] [Neisseria meningitidis MC58]
(katA) catalase [KatA] [Neisseria meningitidis MC58]
(katA) catalase [KatA] [Neisseria meningitidis MC58]
(katA) catalase [KatA] [Neisseria meningitidis MC58]
(katA) catalase [KatA] [Neisseria meningitidis MC58]
(katA) catalase [KatA] [Neisseria meningitidis MC58]
(katA) catalase [KatA] [Neisseria meningitidis MC58]
(katA) catalase [KatA] [Neisseria meningitidis MC58]
(katA) catalase [KatA] [Neisseria meningitidis MC58]
(katA) catalase [KatA] [Neisseria meningitidis MC58]
(katA) catalase [KatA] [Neisseria meningitidis MC58]
(katA) catalase [KatA] [Neisseria meningitidis MC58]
(katA) catalase [KatA] [Neisseria meningitidis MC58]
(katA) catalase [KatA] [Neisseria meningitidis MC58]
(katB) catalase-peroxidase KatB [KatAB] [Legionella pneumophila subsp. pneumophila str. Philadelphia 1]
(katB) catalase-peroxidase KatB [KatAB] [Legionella pneumophila subsp. pneumophila str. Philadelphia 1]
(katB) catalase-peroxidase KatB [KatAB] [Legionella pneumophila subsp. pneumophila str. Philadelphia 1]
(katB) catalase-peroxidase KatB [KatAB] [Legionella pneumophila subsp. pneumophila str. Philadelphia 1]
(katB) catalase-peroxidase KatB [KatAB] [Legionella pneumophila subsp. pneumophila str. Philadelphia 1]
(katB) catalase-peroxidase KatB [KatAB] [Legionella pneumophila subsp. pneumophila str. Philadelphia 1]
(katB) catalase-peroxidase KatB [KatAB] [Legionella pneumophila subsp. pneumophila str. Philadelphia 1]
(katB) catalase-peroxidase KatB [KatAB] [Legionella pneumophila subsp. pneumophila str. Philadelphia 1]
(katB) catalase-peroxidase KatB [KatAB] [Legionella pneumophila subsp. pneumophila str. Philadelphia 1]
(katB) catalase-peroxidase KatB [KatAB] [Legionella pneumophila subsp. pneumophila str. Philadelphia 1]
(katB) catalase-peroxidase KatB [KatAB] [Legionella pneumophila subsp. pneumophila str. Philadelphia 1]
(katB) catalase-peroxidase KatB [KatAB] [Legionella pneumophila subsp. pneumophila str. Philadelphia 1]
(katB) catalase-peroxidase KatB [KatAB] [Legionella pneumophila subsp. pneumophila str. Philadelphia 1]
(katB) catalase-peroxidase KatB [KatAB] [Legionella pneumophila subsp. pneumophila str. Philadelphia 1]
(katB) catalase-peroxidase KatB [KatAB] [Legionella pneumophila subsp. pneumophila str. Philadelphia 1]
(katB) catalase-peroxidase KatB [KatAB] [Legionella pneumophila subsp. pneumophila str. Philadelphia 1]
(katB) catalase-peroxidase KatB [KatAB] [Legionella pneumophila subsp. pneumophila str. Philadelphia 1]
(katB) catalase-peroxidase KatB [KatAB] [Legionella pneumophila subsp. pneumophila str. Philadelphia 1]
(katB) catalase-peroxidase KatB [KatAB] [Legionella pneumophila subsp. pneumophila str. Philadelphia 1]
(kdsA) 2-dehydro-3-deoxyphosphooctonate aldolase [LOS] [Haemophilus influenzae Rd KW20]
(kdsA) 2-dehydro-3-deoxyphosphooctonate aldolase [LOS] [Haemophilus influenzae Rd KW20]
(kdsA) 2-dehydro-3-deoxyphosphooctonate aldolase [LOS] [Haemophilus influenzae Rd KW20]
(kdsA) 2-dehydro-3-deoxyphosphooctonate aldolase [LOS] [Haemophilus influenzae Rd KW20]
(kdsA) 2-dehydro-3-deoxyphosphooctonate aldolase [LOS] [Haemophilus influenzae Rd KW20]
(kdsA) 2-dehydro-3-deoxyphosphooctonate aldolase [LOS] [Haemophilus influenzae Rd KW20]
(kdsA) 2-dehydro-3-deoxyphosphooctonate aldolase [LOS] [Haemophilus influenzae Rd KW20]
(kdsA) 2-dehydro-3-deoxyphosphooctonate aldolase [LOS] [Haemophilus influenzae Rd KW20]
(kdsA) 2-dehydro-3-deoxyphosphooctonate aldolase [LOS] [Haemophilus influenzae Rd KW20]
(kdsA) 2-dehydro-3-deoxyphosphooctonate aldolase [LOS] [Haemophilus influenzae Rd KW20]
(kdsA) 2-dehydro-3-deoxyphosphooctonate aldolase [LOS] [Haemophilus influenzae Rd KW20]
(kdsA) 2-dehydro-3-deoxyphosphooctonate aldolase [LOS] [Haemophilus influenzae Rd KW20]
(kdsA) 2-dehydro-3-deoxyphosphooctonate aldolase [LOS] [Haemophilus influenzae Rd KW20]
(kdsA) 2-dehydro-3-deoxyphosphooctonate aldolase [LOS] [Haemophilus influenzae Rd KW20]
(kdsA) 2-dehydro-3-deoxyphosphooctonate aldolase [LOS] [Haemophilus influenzae Rd KW20]
(kdsA) 2-dehydro-3-deoxyphosphooctonate aldolase [LOS] [Haemophilus influenzae Rd KW20]
(kdsA) 2-dehydro-3-deoxyphosphooctonate aldolase [LOS] [Haemophilus influenzae Rd KW20]
(kdsA) 2-dehydro-3-deoxyphosphooctonate aldolase [LOS] [Haemophilus influenzae Rd KW20]
(kdsA) 2-dehydro-3-deoxyphosphooctonate aldolase [LOS] [Haemophilus influenzae Rd KW20]
(lgtF) beta-1,4-glucosyltransferase [LOS] [Haemophilus influenzae Rd KW20]
(lgtF) beta-1,4-glucosyltransferase [LOS] [Haemophilus influenzae Rd KW20]
(lpxC) UDP-3-O-(R-3-hydroxymyristoyl)-N-acetylglucosamine deacetylase [LOS] [Haemophilus influenzae Rd KW20]
(lpxC) UDP-3-O-(R-3-hydroxymyristoyl)-N-acetylglucosamine deacetylase [LOS] [Haemophilus influenzae Rd KW20]
(lpxC) UDP-3-O-(R-3-hydroxymyristoyl)-N-acetylglucosamine deacetylase [LOS] [Haemophilus influenzae Rd KW20]
(lpxC) UDP-3-O-(R-3-hydroxymyristoyl)-N-acetylglucosamine deacetylase [LOS] [Haemophilus influenzae Rd KW20]
(lpxC) UDP-3-O-(R-3-hydroxymyristoyl)-N-acetylglucosamine deacetylase [LOS] [Haemophilus influenzae Rd KW20]
(lpxC) UDP-3-O-(R-3-hydroxymyristoyl)-N-acetylglucosamine deacetylase [LOS] [Haemophilus influenzae Rd KW20]
(lpxC) UDP-3-O-(R-3-hydroxymyristoyl)-N-acetylglucosamine deacetylase [LOS] [Haemophilus influenzae Rd KW20]
(lpxC) UDP-3-O-(R-3-hydroxymyristoyl)-N-acetylglucosamine deacetylase [LOS] [Haemophilus influenzae Rd KW20]
(lpxC) UDP-3-O-(R-3-hydroxymyristoyl)-N-acetylglucosamine deacetylase [LOS] [Haemophilus influenzae Rd KW20]
(lpxC) UDP-3-O-(R-3-hydroxymyristoyl)-N-acetylglucosamine deacetylase [LOS] [Haemophilus influenzae Rd KW20]
(lpxC) UDP-3-O-(R-3-hydroxymyristoyl)-N-acetylglucosamine deacetylase [LOS] [Haemophilus influenzae Rd KW20]
(lpxC) UDP-3-O-(R-3-hydroxymyristoyl)-N-acetylglucosamine deacetylase [LOS] [Haemophilus influenzae Rd KW20]
(lpxC) UDP-3-O-(R-3-hydroxymyristoyl)-N-acetylglucosamine deacetylase [LOS] [Haemophilus influenzae Rd KW20]
(lpxC) UDP-3-O-(R-3-hydroxymyristoyl)-N-acetylglucosamine deacetylase [LOS] [Haemophilus influenzae Rd KW20]
(lpxC) UDP-3-O-(R-3-hydroxymyristoyl)-N-acetylglucosamine deacetylase [LOS] [Haemophilus influenzae Rd KW20]
(lpxC) UDP-3-O-(R-3-hydroxymyristoyl)-N-acetylglucosamine deacetylase [LOS] [Haemophilus influenzae Rd KW20]
(lpxC) UDP-3-O-(R-3-hydroxymyristoyl)-N-acetylglucosamine deacetylase [LOS] [Haemophilus influenzae Rd KW20]
(lpxC) UDP-3-O-(R-3-hydroxymyristoyl)-N-acetylglucosamine deacetylase [LOS] [Haemophilus influenzae Rd KW20]
(lpxC) UDP-3-O-(R-3-hydroxymyristoyl)-N-acetylglucosamine deacetylase [LOS] [Haemophilus influenzae Rd KW20]
(lpxD) UDP-3-O-(3-hydroxymyristoyl) glucosamine N-acyltransferase [LOS] [Haemophilus influenzae Rd KW20]
(lpxD) UDP-3-O-(3-hydroxymyristoyl) glucosamine N-acyltransferase [LOS] [Haemophilus influenzae Rd KW20]
(lpxD) UDP-3-O-(3-hydroxymyristoyl) glucosamine N-acyltransferase [LOS] [Haemophilus influenzae Rd KW20]
(lpxD) UDP-3-O-(3-hydroxymyristoyl) glucosamine N-acyltransferase [LOS] [Haemophilus influenzae Rd KW20]
(lpxD) UDP-3-O-(3-hydroxymyristoyl) glucosamine N-acyltransferase [LOS] [Haemophilus influenzae Rd KW20]
(lpxD) UDP-3-O-(3-hydroxymyristoyl) glucosamine N-acyltransferase [LOS] [Haemophilus influenzae Rd KW20]
(lpxD) UDP-3-O-(3-hydroxymyristoyl) glucosamine N-acyltransferase [LOS] [Haemophilus influenzae Rd KW20]
(lpxD) UDP-3-O-(3-hydroxymyristoyl) glucosamine N-acyltransferase [LOS] [Haemophilus influenzae Rd KW20]
(lpxD) UDP-3-O-(3-hydroxymyristoyl) glucosamine N-acyltransferase [LOS] [Haemophilus influenzae Rd KW20]
(lpxD) UDP-3-O-(3-hydroxymyristoyl) glucosamine N-acyltransferase [LOS] [Haemophilus influenzae Rd KW20]
(lpxD) UDP-3-O-(3-hydroxymyristoyl) glucosamine N-acyltransferase [LOS] [Haemophilus influenzae Rd KW20]
(lpxD) UDP-3-O-(3-hydroxymyristoyl) glucosamine N-acyltransferase [LOS] [Haemophilus influenzae Rd KW20]
(lpxD) UDP-3-O-(3-hydroxymyristoyl) glucosamine N-acyltransferase [LOS] [Haemophilus influenzae Rd KW20]
(lpxD) UDP-3-O-(3-hydroxymyristoyl) glucosamine N-acyltransferase [LOS] [Haemophilus influenzae Rd KW20]
(lpxD) UDP-3-O-(3-hydroxymyristoyl) glucosamine N-acyltransferase [LOS] [Haemophilus influenzae Rd KW20]
(lpxD) UDP-3-O-(3-hydroxymyristoyl) glucosamine N-acyltransferase [LOS] [Haemophilus influenzae Rd KW20]
(lpxD) UDP-3-O-(3-hydroxymyristoyl) glucosamine N-acyltransferase [LOS] [Haemophilus influenzae Rd KW20]
(lpxD) UDP-3-O-(3-hydroxymyristoyl) glucosamine N-acyltransferase [LOS] [Haemophilus influenzae Rd KW20]
(lpxD) UDP-3-O-(3-hydroxymyristoyl) glucosamine N-acyltransferase [LOS] [Haemophilus influenzae Rd KW20]
(luxS) S-ribosylhomocysteinase [AI-2] [Vibrio cholerae O1 biovar El Tor str. N16961]
(luxS) S-ribosylhomocysteinase [AI-2] [Vibrio cholerae O1 biovar El Tor str. N16961]
(luxS) S-ribosylhomocysteinase [AI-2] [Vibrio cholerae O1 biovar El Tor str. N16961]
(luxS) S-ribosylhomocysteinase [AI-2] [Vibrio cholerae O1 biovar El Tor str. N16961]
(luxS) S-ribosylhomocysteinase [AI-2] [Vibrio cholerae O1 biovar El Tor str. N16961]
(luxS) S-ribosylhomocysteinase [AI-2] [Vibrio cholerae O1 biovar El Tor str. N16961]
(luxS) S-ribosylhomocysteinase [AI-2] [Vibrio cholerae O1 biovar El Tor str. N16961]
(luxS) S-ribosylhomocysteinase [AI-2] [Vibrio cholerae O1 biovar El Tor str. N16961]
(luxS) S-ribosylhomocysteinase [AI-2] [Vibrio cholerae O1 biovar El Tor str. N16961]
(luxS) S-ribosylhomocysteinase [AI-2] [Vibrio cholerae O1 biovar El Tor str. N16961]
(luxS) S-ribosylhomocysteinase [AI-2] [Vibrio cholerae O1 biovar El Tor str. N16961]
(luxS) S-ribosylhomocysteinase [AI-2] [Vibrio cholerae O1 biovar El Tor str. N16961]
(luxS) S-ribosylhomocysteinase [AI-2] [Vibrio cholerae O1 biovar El Tor str. N16961]
(luxS) S-ribosylhomocysteinase [AI-2] [Vibrio cholerae O1 biovar El Tor str. N16961]
(luxS) S-ribosylhomocysteinase [AI-2] [Vibrio cholerae O1 biovar El Tor str. N16961]
(luxS) S-ribosylhomocysteinase [AI-2] [Vibrio cholerae O1 biovar El Tor str. N16961]
(luxS) S-ribosylhomocysteinase [AI-2] [Vibrio cholerae O1 biovar El Tor str. N16961]
(luxS) S-ribosylhomocysteinase [AI-2] [Vibrio cholerae O1 biovar El Tor str. N16961]
(luxS) S-ribosylhomocysteinase [AI-2] [Vibrio cholerae O1 biovar El Tor str. N16961]
(manB) phosphomannomutase [O-antigen] [Yersinia enterocolitica subsp. enterocolitica 8081]
(mgtB) Mg2+ transport protein [MgtBC] [Salmonella enterica subsp. enterica serovar Typhimurium str. LT2]
(mgtB) Mg2+ transport protein [MgtBC] [Salmonella enterica subsp. enterica serovar Typhimurium str. LT2]
(mgtB) Mg2+ transport protein [MgtBC] [Salmonella enterica subsp. enterica serovar Typhimurium str. LT2]
(mgtB) Mg2+ transport protein [MgtBC] [Salmonella enterica subsp. enterica serovar Typhimurium str. LT2]
(mgtB) Mg2+ transport protein [MgtBC] [Salmonella enterica subsp. enterica serovar Typhimurium str. LT2]
(mgtB) Mg2+ transport protein [MgtBC] [Salmonella enterica subsp. enterica serovar Typhimurium str. LT2]
(mgtB) Mg2+ transport protein [MgtBC] [Salmonella enterica subsp. enterica serovar Typhimurium str. LT2]
(mgtB) Mg2+ transport protein [MgtBC] [Salmonella enterica subsp. enterica serovar Typhimurium str. LT2]
(mgtB) Mg2+ transport protein [MgtBC] [Salmonella enterica subsp. enterica serovar Typhimurium str. LT2]
(mgtB) Mg2+ transport protein [MgtBC] [Salmonella enterica subsp. enterica serovar Typhimurium str. LT2]
(mgtB) Mg2+ transport protein [MgtBC] [Salmonella enterica subsp. enterica serovar Typhimurium str. LT2]
(mgtB) Mg2+ transport protein [MgtBC] [Salmonella enterica subsp. enterica serovar Typhimurium str. LT2]
(mgtB) Mg2+ transport protein [MgtBC] [Salmonella enterica subsp. enterica serovar Typhimurium str. LT2]
(mgtB) Mg2+ transport protein [MgtBC] [Salmonella enterica subsp. enterica serovar Typhimurium str. LT2]
(mgtB) Mg2+ transport protein [MgtBC] [Salmonella enterica subsp. enterica serovar Typhimurium str. LT2]
(mgtB) Mg2+ transport protein [MgtBC] [Salmonella enterica subsp. enterica serovar Typhimurium str. LT2]
(mgtB) Mg2+ transport protein [MgtBC] [Salmonella enterica subsp. enterica serovar Typhimurium str. LT2]
(mgtB) Mg2+ transport protein [MgtBC] [Salmonella enterica subsp. enterica serovar Typhimurium str. LT2]
(mgtB) Mg2+ transport protein [MgtBC] [Salmonella enterica subsp. enterica serovar Typhimurium str. LT2]
(motD) flagellar motor protein [Deoxyhexose linking sugar, 209 Da capping structure] [Pseudomonas aeruginosa PAO1]
(msbA) lipid transporter ATP-binding/permease [LOS] [Haemophilus influenzae Rd KW20]
(msbA) lipid transporter ATP-binding/permease [LOS] [Haemophilus influenzae Rd KW20]
(msbA) lipid transporter ATP-binding/permease [LOS] [Haemophilus influenzae Rd KW20]
(msbA) lipid transporter ATP-binding/permease [LOS] [Haemophilus influenzae Rd KW20]
(msbA) lipid transporter ATP-binding/permease [LOS] [Haemophilus influenzae Rd KW20]
(mtrD) multiple transferable resistance system protein MtrD [MtrCDE] [Neisseria meningitidis MC58]
(mtrD) multiple transferable resistance system protein MtrD [MtrCDE] [Neisseria meningitidis MC58]
(mtrD) multiple transferable resistance system protein MtrD [MtrCDE] [Neisseria meningitidis MC58]
(mucD) serine protease MucD precursor [Alginate regulation] [Pseudomonas aeruginosa PAO1]
(mucD) serine protease MucD precursor [Alginate regulation] [Pseudomonas aeruginosa PAO1]
(mucD) serine protease MucD precursor [Alginate regulation] [Pseudomonas aeruginosa PAO1]
(mucD) serine protease MucD precursor [Alginate regulation] [Pseudomonas aeruginosa PAO1]
(mucD) serine protease MucD precursor [Alginate regulation] [Pseudomonas aeruginosa PAO1]
(mucD) serine protease MucD precursor [Alginate regulation] [Pseudomonas aeruginosa PAO1]
(mucD) serine protease MucD precursor [Alginate regulation] [Pseudomonas aeruginosa PAO1]
(mucD) serine protease MucD precursor [Alginate regulation] [Pseudomonas aeruginosa PAO1]
(mucD) serine protease MucD precursor [Alginate regulation] [Pseudomonas aeruginosa PAO1]
(mucD) serine protease MucD precursor [Alginate regulation] [Pseudomonas aeruginosa PAO1]
(mucD) serine protease MucD precursor [Alginate regulation] [Pseudomonas aeruginosa PAO1]
(mucD) serine protease MucD precursor [Alginate regulation] [Pseudomonas aeruginosa PAO1]
(mucD) serine protease MucD precursor [Alginate regulation] [Pseudomonas aeruginosa PAO1]
(mucP) metalloprotease protease [Alginate regulation] [Pseudomonas aeruginosa PAO1]
(mucP) metalloprotease protease [Alginate regulation] [Pseudomonas aeruginosa PAO1]
(mucP) metalloprotease protease [Alginate regulation] [Pseudomonas aeruginosa PAO1]
(mucP) metalloprotease protease [Alginate regulation] [Pseudomonas aeruginosa PAO1]
(mucP) metalloprotease protease [Alginate regulation] [Pseudomonas aeruginosa PAO1]
(mucP) metalloprotease protease [Alginate regulation] [Pseudomonas aeruginosa PAO1]
(mucP) metalloprotease protease [Alginate regulation] [Pseudomonas aeruginosa PAO1]
(mucP) metalloprotease protease [Alginate regulation] [Pseudomonas aeruginosa PAO1]
(mucP) metalloprotease protease [Alginate regulation] [Pseudomonas aeruginosa PAO1]
(mucP) metalloprotease protease [Alginate regulation] [Pseudomonas aeruginosa PAO1]
(mucP) metalloprotease protease [Alginate regulation] [Pseudomonas aeruginosa PAO1]
(mucP) metalloprotease protease [Alginate regulation] [Pseudomonas aeruginosa PAO1]
(mucP) metalloprotease protease [Alginate regulation] [Pseudomonas aeruginosa PAO1]
(mucP) metalloprotease protease [Alginate regulation] [Pseudomonas aeruginosa PAO1]
(neuB1) sialic acid synthase [LOS] [Campylobacter jejuni subsp. jejuni NCTC 11168]
(ompA) outer membrane protein A [OmpA] [Escherichia coli O18:K1:H7 str. RS218]
(ompA) outer membrane protein A [OmpA] [Escherichia coli O18:K1:H7 str. RS218]
(ompA) outer membrane protein A [OmpA] [Escherichia coli O18:K1:H7 str. RS218]
(ompA) outer membrane protein A [OmpA] [Escherichia coli O18:K1:H7 str. RS218]
(ompA) outer membrane protein A [OmpA] [Escherichia coli O18:K1:H7 str. RS218]
(ompA) outer membrane protein A [OmpA] [Escherichia coli O18:K1:H7 str. RS218]
(ompA) outer membrane protein A [OmpA] [Escherichia coli O18:K1:H7 str. RS218]
(ompA) outer membrane protein A [OmpA] [Escherichia coli O18:K1:H7 str. RS218]
(ompA) outer membrane protein A [OmpA] [Escherichia coli O18:K1:H7 str. RS218]
(ompA) outer membrane protein A [OmpA] [Escherichia coli O18:K1:H7 str. RS218]
(ompA) outer membrane protein A [OmpA] [Escherichia coli O18:K1:H7 str. RS218]
(ompA) outer membrane protein A [OmpA] [Escherichia coli O18:K1:H7 str. RS218]
(ompA) outer membrane protein A [OmpA] [Escherichia coli O18:K1:H7 str. RS218]
(ompA) outer membrane protein A [OmpA] [Escherichia coli O18:K1:H7 str. RS218]
(ompA) outer membrane protein A [OmpA] [Escherichia coli O18:K1:H7 str. RS218]
(ompA) outer membrane protein A [OmpA] [Escherichia coli O18:K1:H7 str. RS218]
(ompA) outer membrane protein A [OmpA] [Escherichia coli O18:K1:H7 str. RS218]
(ompA) outer membrane protein A [OmpA] [Escherichia coli O18:K1:H7 str. RS218]
(pcrD) type III secretion system protein PcrD [TTSS] [Pseudomonas aeruginosa PAO1]
(pcrD) type III secretion system protein PcrD [TTSS] [Pseudomonas aeruginosa PAO1]
(pilA) type 4 fimbrial precursor PilA [Type IV pili] [Pseudomonas aeruginosa PAO1]
(pilA) type 4 fimbrial precursor PilA [Type IV pili] [Pseudomonas aeruginosa PAO1]
(pilA) type 4 fimbrial precursor PilA [Type IV pili] [Pseudomonas aeruginosa PAO1]
(pilB) type IV pilus assembly protein [Type IV pili] [Burkholderia pseudomallei K96243]
(pilE/pilA) type IV pilus assembly protein, major pilin [type IV pili] [Legionella pneumophila subsp. pneumophila str. Philadelphia 1]
(pilE/pilA) type IV pilus assembly protein, major pilin [type IV pili] [Legionella pneumophila subsp. pneumophila str. Philadelphia 1]
(pilT) twitching motility protein PilT [Type IV pili] [Neisseria meningitidis MC58]
(pilT) twitching motility protein PilT [Type IV pili] [Neisseria meningitidis MC58]
(pilT) twitching motility protein PilT [Type IV pili] [Neisseria meningitidis MC58]
(pilT) twitching motility protein PilT [Type IV pili] [Neisseria meningitidis MC58]
(pilT) twitching motility protein PilT [Type IV pili] [Neisseria meningitidis MC58]
(pilT) twitching motility protein PilT [Type IV pili] [Neisseria meningitidis MC58]
(pilT) twitching motility protein PilT [Type IV pili] [Neisseria meningitidis MC58]
(pilT) twitching motility protein PilT [Type IV pili] [Neisseria meningitidis MC58]
(pilT) twitching motility protein PilT [Type IV pili] [Neisseria meningitidis MC58]
(pilT) twitching motility protein PilT [Type IV pili] [Neisseria meningitidis MC58]
(pilT) twitching motility protein PilT [Type IV pili] [Neisseria meningitidis MC58]
(pilT) twitching motility protein PilT [Type IV pili] [Neisseria meningitidis MC58]
(pilT) twitching motility protein PilT [Type IV pili] [Neisseria meningitidis MC58]
(pilT) twitching motility protein PilT [Type IV pili] [Neisseria meningitidis MC58]
(pilT) twitching motility protein PilT [Type IV pili] [Pseudomonas aeruginosa PAO1]
(pilT) twitching motility protein PilT [Type IV pili] [Pseudomonas aeruginosa PAO1]
(pilT) twitching motility protein PilT [Type IV pili] [Pseudomonas aeruginosa PAO1]
(pilT) twitching motility protein PilT [Type IV pili] [Pseudomonas aeruginosa PAO1]
(pilT) twitching motility protein PilT [Type IV pili] [Pseudomonas aeruginosa PAO1]
(pilU) twitching motility protein PilU [Type IV pili] [Pseudomonas aeruginosa PAO1]
(pilU) twitching motility protein PilU [Type IV pili] [Pseudomonas aeruginosa PAO1]
(pilU) twitching motility protein PilU [Type IV pili] [Pseudomonas aeruginosa PAO1]
(pilU) twitching motility protein PilU [Type IV pili] [Pseudomonas aeruginosa PAO1]
(pilU) twitching motility protein PilU [Type IV pili] [Pseudomonas aeruginosa PAO1]
(pilU) twitching motility protein PilU [Type IV pili] [Pseudomonas aeruginosa PAO1]
(pvdI) peptide synthase [pyoverdine] [Pseudomonas aeruginosa PAO1]
(pvdI) peptide synthase [pyoverdine] [Pseudomonas aeruginosa PAO1]
(pvdI) peptide synthase [pyoverdine] [Pseudomonas aeruginosa PAO1]
(pvdI) peptide synthase [pyoverdine] [Pseudomonas aeruginosa PAO1]
(pvdI) peptide synthase [pyoverdine] [Pseudomonas aeruginosa PAO1]
(pvdI) peptide synthase [pyoverdine] [Pseudomonas aeruginosa PAO1]
(pvdI) peptide synthase [pyoverdine] [Pseudomonas aeruginosa PAO1]
(pvdI) peptide synthase [pyoverdine] [Pseudomonas aeruginosa PAO1]
(pvdJ) pyoverdine biosynthesis protein PvdJ [pyoverdine] [Pseudomonas aeruginosa PAO1]
(pvdJ) pyoverdine biosynthesis protein PvdJ [pyoverdine] [Pseudomonas aeruginosa PAO1]
(pvdJ) pyoverdine biosynthesis protein PvdJ [pyoverdine] [Pseudomonas aeruginosa PAO1]
(pvdJ) pyoverdine biosynthesis protein PvdJ [pyoverdine] [Pseudomonas aeruginosa PAO1]
(pvdJ) pyoverdine biosynthesis protein PvdJ [pyoverdine] [Pseudomonas aeruginosa PAO1]
(pvdJ) pyoverdine biosynthesis protein PvdJ [pyoverdine] [Pseudomonas aeruginosa PAO1]
(pvdJ) pyoverdine biosynthesis protein PvdJ [pyoverdine] [Pseudomonas aeruginosa PAO1]
(pvdJ) pyoverdine biosynthesis protein PvdJ [pyoverdine] [Pseudomonas aeruginosa PAO1]
(pvdL) peptide synthase PvdL [pyoverdine] [Pseudomonas aeruginosa PAO1]
(rfaD) ADP-L-glycero-D-mannoheptose-6-epimerase [LOS] [Haemophilus influenzae Rd KW20]
(rfaD) ADP-L-glycero-D-mannoheptose-6-epimerase [LOS] [Haemophilus influenzae Rd KW20]
(rfaD) ADP-L-glycero-D-mannoheptose-6-epimerase [LOS] [Haemophilus influenzae Rd KW20]
(rfaD) ADP-L-glycero-D-mannoheptose-6-epimerase [LOS] [Haemophilus influenzae Rd KW20]
(rfaD) ADP-L-glycero-D-mannoheptose-6-epimerase [LOS] [Haemophilus influenzae Rd KW20]
(rfaD) ADP-L-glycero-D-mannoheptose-6-epimerase [LOS] [Haemophilus influenzae Rd KW20]
(rfaD) ADP-L-glycero-D-mannoheptose-6-epimerase [LOS] [Haemophilus influenzae Rd KW20]
(rfaD) ADP-L-glycero-D-mannoheptose-6-epimerase [LOS] [Haemophilus influenzae Rd KW20]
(rfaD) ADP-L-glycero-D-mannoheptose-6-epimerase [LOS] [Haemophilus influenzae Rd KW20]
(rfaD) ADP-L-glycero-D-mannoheptose-6-epimerase [LOS] [Haemophilus influenzae Rd KW20]
(rfaD) ADP-L-glycero-D-mannoheptose-6-epimerase [LOS] [Haemophilus influenzae Rd KW20]
(rfaD) ADP-L-glycero-D-mannoheptose-6-epimerase [LOS] [Haemophilus influenzae Rd KW20]
(rfaD) ADP-L-glycero-D-mannoheptose-6-epimerase [LOS] [Haemophilus influenzae Rd KW20]
(rfaD) ADP-L-glycero-D-mannoheptose-6-epimerase [LOS] [Haemophilus influenzae Rd KW20]
(rfaD) ADP-L-glycero-D-mannoheptose-6-epimerase [LOS] [Haemophilus influenzae Rd KW20]
(rfaD) ADP-L-glycero-D-mannoheptose-6-epimerase [LOS] [Haemophilus influenzae Rd KW20]
(rfaD) ADP-L-glycero-D-mannoheptose-6-epimerase [LOS] [Haemophilus influenzae Rd KW20]
(rfaD) ADP-L-glycero-D-mannoheptose-6-epimerase [LOS] [Haemophilus influenzae Rd KW20]
(rfaD) ADP-L-glycero-D-mannoheptose-6-epimerase [LOS] [Haemophilus influenzae Rd KW20]
(rffG) dTDP-glucose 46-dehydratase [LOS] [Haemophilus influenzae Rd KW20]
(rffG) dTDP-glucose 46-dehydratase [LOS] [Haemophilus influenzae Rd KW20]
(rffG) dTDP-glucose 46-dehydratase [LOS] [Haemophilus influenzae Rd KW20]
(rffG) dTDP-glucose 46-dehydratase [LOS] [Haemophilus influenzae Rd KW20]
(rffG) dTDP-glucose 46-dehydratase [LOS] [Haemophilus influenzae Rd KW20]
(rffG) dTDP-glucose 46-dehydratase [LOS] [Haemophilus influenzae Rd KW20]
(rffG) dTDP-glucose 46-dehydratase [LOS] [Haemophilus influenzae Rd KW20]
(spaP) type III secretion system minor export apparatus protein SpaP [TTSS(SPI-1 encode)] [Salmonella enterica subsp. enterica serovar Typhimurium str. LT2]
(spaP) type III secretion system minor export apparatus protein SpaP [TTSS(SPI-1 encode)] [Salmonella enterica subsp. enterica serovar Typhimurium str. LT2]
(spaP) type III secretion system minor export apparatus protein SpaP [TTSS(SPI-1 encode)] [Salmonella enterica subsp. enterica serovar Typhimurium str. LT2]
(spaP) type III secretion system minor export apparatus protein SpaP [TTSS(SPI-1 encode)] [Salmonella enterica subsp. enterica serovar Typhimurium str. LT2]
(spaP) type III secretion system minor export apparatus protein SpaP [TTSS(SPI-1 encode)] [Salmonella enterica subsp. enterica serovar Typhimurium str. LT2]
(spaP) type III secretion system minor export apparatus protein SpaP [TTSS(SPI-1 encode)] [Salmonella enterica subsp. enterica serovar Typhimurium str. LT2]
(spaP) type III secretion system minor export apparatus protein SpaP [TTSS(SPI-1 encode)] [Salmonella enterica subsp. enterica serovar Typhimurium str. LT2]
(spaP) type III secretion system minor export apparatus protein SpaP [TTSS(SPI-1 encode)] [Salmonella enterica subsp. enterica serovar Typhimurium str. LT2]
(tagT) type six secretion associated protein TagT, ATP-binding component of ABC transporter [HSI-I] [Pseudomonas aeruginosa PAO1]
(tcpI) toxin co-regulated pilus biosynthesis protein I [TCP] [Vibrio cholerae O1 biovar El Tor str. N16961]
(tcpI) toxin co-regulated pilus biosynthesis protein I [TCP] [Vibrio cholerae O1 biovar El Tor str. N16961]
(tcpI) toxin co-regulated pilus biosynthesis protein I [TCP] [Vibrio cholerae O1 biovar El Tor str. N16961]
(tcpI) toxin co-regulated pilus biosynthesis protein I [TCP] [Vibrio cholerae O1 biovar El Tor str. N16961]
(tcpI) toxin co-regulated pilus biosynthesis protein I [TCP] [Vibrio cholerae O1 biovar El Tor str. N16961]
(tcpI) toxin co-regulated pilus biosynthesis protein I [TCP] [Vibrio cholerae O1 biovar El Tor str. N16961]
(tcpI) toxin co-regulated pilus biosynthesis protein I [TCP] [Vibrio cholerae O1 biovar El Tor str. N16961]
(tcpI) toxin co-regulated pilus biosynthesis protein I [TCP] [Vibrio cholerae O1 biovar El Tor str. N16961]
(tlpA) membrane-bound chemoreceptor sensing arginine and bicarbonate [Pse5Ac7Ac] [Helicobacter pylori 26695]
(tlpA) membrane-bound chemoreceptor sensing arginine and bicarbonate [Pse5Ac7Ac] [Helicobacter pylori 26695]
(tlpB) membrane-bound chemoreceptor sensing pH and autoinducer-2 [Pse5Ac7Ac] [Helicobacter pylori 26695]
(tlpB) membrane-bound chemoreceptor sensing pH and autoinducer-2 [Pse5Ac7Ac] [Helicobacter pylori 26695]
(tlpB) membrane-bound chemoreceptor sensing pH and autoinducer-2 [Pse5Ac7Ac] [Helicobacter pylori 26695]
(tlpB) membrane-bound chemoreceptor sensing pH and autoinducer-2 [Pse5Ac7Ac] [Helicobacter pylori 26695]
(tlpC) membrane-bound chemoreceptor [Pse5Ac7Ac] [Helicobacter pylori 26695]
(tlpC) membrane-bound chemoreceptor [Pse5Ac7Ac] [Helicobacter pylori 26695]
(tlpC) membrane-bound chemoreceptor [Pse5Ac7Ac] [Helicobacter pylori 26695]
(tsr) methyl-accepting chemotaxis protein I [Flagella] [Burkholderia pseudomallei K96243]
(tsr) methyl-accepting chemotaxis protein I [Flagella] [Burkholderia pseudomallei K96243]
(tsr) methyl-accepting chemotaxis protein I [Flagella] [Burkholderia pseudomallei K96243]
(tsr) methyl-accepting chemotaxis protein I [Flagella] [Burkholderia pseudomallei K96243]
(tsr) methyl-accepting chemotaxis protein I [Flagella] [Burkholderia pseudomallei K96243]
(tsr) methyl-accepting chemotaxis protein I [Flagella] [Burkholderia pseudomallei K96243]
(tsr) methyl-accepting chemotaxis protein I [Flagella] [Burkholderia pseudomallei K96243]
(tsr) methyl-accepting chemotaxis protein I [Flagella] [Burkholderia pseudomallei K96243]
(tsr) methyl-accepting chemotaxis protein I [Flagella] [Burkholderia pseudomallei K96243]
(tssH-5/clpV) Clp-type ATPase chaperone protein [T6SS-1] [Burkholderia pseudomallei K96243]
(tssH-5/clpV) Clp-type ATPase chaperone protein [T6SS-1] [Burkholderia pseudomallei K96243]
(tssH-5/clpV) Clp-type ATPase chaperone protein [T6SS-1] [Burkholderia pseudomallei K96243]
(tssH-5/clpV) Clp-type ATPase chaperone protein [T6SS-1] [Burkholderia pseudomallei K96243]
(tssH-5/clpV) Clp-type ATPase chaperone protein [T6SS-1] [Burkholderia pseudomallei K96243]
(tssH-5/clpV) Clp-type ATPase chaperone protein [T6SS-1] [Burkholderia pseudomallei K96243]
(tssH-5/clpV) Clp-type ATPase chaperone protein [T6SS-1] [Burkholderia pseudomallei K96243]
(tssH-5/clpV) Clp-type ATPase chaperone protein [T6SS-1] [Burkholderia pseudomallei K96243]
(tssH-5/clpV) Clp-type ATPase chaperone protein [T6SS-1] [Burkholderia pseudomallei K96243]
(tssH-5/clpV) Clp-type ATPase chaperone protein [T6SS-1] [Burkholderia pseudomallei K96243]
(tssH-5/clpV) Clp-type ATPase chaperone protein [T6SS-1] [Burkholderia pseudomallei K96243]
(tssH-5/clpV) Clp-type ATPase chaperone protein [T6SS-1] [Burkholderia pseudomallei K96243]
(tssH-5/clpV) Clp-type ATPase chaperone protein [T6SS-1] [Burkholderia pseudomallei K96243]
(tviB) Vi polysaccharide biosynthesis protein, UDP-glucose/GDP-mannose dehydrogenase TviB [Vi antigen] [Salmonella enterica subsp. enterica serovar Typhi str. CT18]
(tviB) Vi polysaccharide biosynthesis protein, UDP-glucose/GDP-mannose dehydrogenase TviB [Vi antigen] [Salmonella enterica subsp. enterica serovar Typhi str. CT18]
(vasH) type VI secretion system regulatory protein VasH [T6SS] [Vibrio cholerae O1 biovar El Tor str. N16961]
(vasH) type VI secretion system regulatory protein VasH [T6SS] [Vibrio cholerae O1 biovar El Tor str. N16961]
(vasH) type VI secretion system regulatory protein VasH [T6SS] [Vibrio cholerae O1 biovar El Tor str. N16961]
(vasH) type VI secretion system regulatory protein VasH [T6SS] [Vibrio cholerae O1 biovar El Tor str. N16961]
(vasH) type VI secretion system regulatory protein VasH [T6SS] [Vibrio cholerae O1 biovar El Tor str. N16961]
(vasH) type VI secretion system regulatory protein VasH [T6SS] [Vibrio cholerae O1 biovar El Tor str. N16961]
(vasH) type VI secretion system regulatory protein VasH [T6SS] [Vibrio cholerae O1 biovar El Tor str. N16961]
(vasH) type VI secretion system regulatory protein VasH [T6SS] [Vibrio cholerae O1 biovar El Tor str. N16961]
(vasH) type VI secretion system regulatory protein VasH [T6SS] [Vibrio cholerae O1 biovar El Tor str. N16961]
(vasH) type VI secretion system regulatory protein VasH [T6SS] [Vibrio cholerae O1 biovar El Tor str. N16961]
(vgrG-2) type VI secretion system substrate VgrG-2 [VAS] [Vibrio cholerae O1 biovar El Tor str. N16961]
(vgrG-2) type VI secretion system substrate VgrG-2 [VAS] [Vibrio cholerae O1 biovar El Tor str. N16961]
(vgrG-2) type VI secretion system substrate VgrG-2 [VAS] [Vibrio cholerae O1 biovar El Tor str. N16961]
(vgrG-2) type VI secretion system substrate VgrG-2 [VAS] [Vibrio cholerae O1 biovar El Tor str. N16961]
(vgrG-2) type VI secretion system substrate VgrG-2 [VAS] [Vibrio cholerae O1 biovar El Tor str. N16961]
(vgrG-2) type VI secretion system substrate VgrG-2 [VAS] [Vibrio cholerae O1 biovar El Tor str. N16961]
(vgrG-2) type VI secretion system substrate VgrG-2 [VAS] [Vibrio cholerae O1 biovar El Tor str. N16961]
(vgrG-2) type VI secretion system substrate VgrG-2 [VAS] [Vibrio cholerae O1 biovar El Tor str. N16961]
(vgrG-2) type VI secretion system substrate VgrG-2 [VAS] [Vibrio cholerae O1 biovar El Tor str. N16961]
(vgrG-2) type VI secretion system substrate VgrG-2 [VAS] [Vibrio cholerae O1 biovar El Tor str. N16961]
(vgrG-2) type VI secretion system substrate VgrG-2 [VAS] [Vibrio cholerae O1 biovar El Tor str. N16961]
(vgrG-2) type VI secretion system substrate VgrG-2 [VAS] [Vibrio cholerae O1 biovar El Tor str. N16961]
(vgrG-2) type VI secretion system substrate VgrG-2 [VAS] [Vibrio cholerae O1 biovar El Tor str. N16961]
(vgrG-3) type VI secretion system effector VgrG-3 protein, lysozyme-like activity, VgrG-3 and TsaB are a toxin-antitoxin complex [T6SS] [Vibrio cholerae O1 biovar El Tor str. N16961]
(vgrG-3) type VI secretion system effector VgrG-3 protein, lysozyme-like activity, VgrG-3 and TsaB are a toxin-antitoxin complex [T6SS] [Vibrio cholerae O1 biovar El Tor str. N16961]
(vgrG-3) type VI secretion system effector VgrG-3 protein, lysozyme-like activity, VgrG-3 and TsaB are a toxin-antitoxin complex [T6SS] [Vibrio cholerae O1 biovar El Tor str. N16961]
(vgrG-3) type VI secretion system effector VgrG-3 protein, lysozyme-like activity, VgrG-3 and TsaB are a toxin-antitoxin complex [T6SS] [Vibrio cholerae O1 biovar El Tor str. N16961]
(vgrG-3) type VI secretion system effector VgrG-3 protein, lysozyme-like activity, VgrG-3 and TsaB are a toxin-antitoxin complex [T6SS] [Vibrio cholerae O1 biovar El Tor str. N16961]
(vgrG-3) type VI secretion system effector VgrG-3 protein, lysozyme-like activity, VgrG-3 and TsaB are a toxin-antitoxin complex [T6SS] [Vibrio cholerae O1 biovar El Tor str. N16961]
(vipB/mglB) type VI secretion system tubule-forming protein VipB [T6SS] [Vibrio cholerae O1 biovar El Tor str. N16961]
(vipB/mglB) type VI secretion system tubule-forming protein VipB [T6SS] [Vibrio cholerae O1 biovar El Tor str. N16961]
(vipB/mglB) type VI secretion system tubule-forming protein VipB [T6SS] [Vibrio cholerae O1 biovar El Tor str. N16961]
(vipB/mglB) type VI secretion system tubule-forming protein VipB [T6SS] [Vibrio cholerae O1 biovar El Tor str. N16961]
(vipB/mglB) type VI secretion system tubule-forming protein VipB [T6SS] [Vibrio cholerae O1 biovar El Tor str. N16961]
(vipB/mglB) type VI secretion system tubule-forming protein VipB [T6SS] [Vibrio cholerae O1 biovar El Tor str. N16961]
(vipB/mglB) type VI secretion system tubule-forming protein VipB [T6SS] [Vibrio cholerae O1 biovar El Tor str. N16961]
(vipB/mglB) type VI secretion system tubule-forming protein VipB [T6SS] [Vibrio cholerae O1 biovar El Tor str. N16961]
(vipB/mglB) type VI secretion system tubule-forming protein VipB [T6SS] [Vibrio cholerae O1 biovar El Tor str. N16961]
(vipB/mglB) type VI secretion system tubule-forming protein VipB [T6SS] [Vibrio cholerae O1 biovar El Tor str. N16961]
(vipB/mglB) type VI secretion system tubule-forming protein VipB [T6SS] [Vibrio cholerae O1 biovar El Tor str. N16961]
(vipB/mglB) type VI secretion system tubule-forming protein VipB [T6SS] [Vibrio cholerae O1 biovar El Tor str. N16961]
(vipB/mglB) type VI secretion system tubule-forming protein VipB [T6SS] [Vibrio cholerae O1 biovar El Tor str. N16961]
(wecA) undecaprenyl-phosphate alpha-N-acetylglucosaminyltransferase [LOS] [Haemophilus influenzae Rd KW20]
(xcpR) general secretion pathway protein E [xcp secretion system] [Pseudomonas aeruginosa PAO1]
(xcpR) general secretion pathway protein E [xcp secretion system] [Pseudomonas aeruginosa PAO1]
(xcpR) general secretion pathway protein E [xcp secretion system] [Pseudomonas aeruginosa PAO1]
(xcpR) general secretion pathway protein E [xcp secretion system] [Pseudomonas aeruginosa PAO1]
(xcpR) general secretion pathway protein E [xcp secretion system] [Pseudomonas aeruginosa PAO1]
(xcpR) general secretion pathway protein E [xcp secretion system] [Pseudomonas aeruginosa PAO1]
(xcpR) general secretion pathway protein E [xcp secretion system] [Pseudomonas aeruginosa PAO1]
(xcpR) general secretion pathway protein E [xcp secretion system] [Pseudomonas aeruginosa PAO1]
(xcpR) general secretion pathway protein E [xcp secretion system] [Pseudomonas aeruginosa PAO1]
(xcpR) general secretion pathway protein E [xcp secretion system] [Pseudomonas aeruginosa PAO1]
(xcpR) general secretion pathway protein E [xcp secretion system] [Pseudomonas aeruginosa PAO1]
(xcpR) general secretion pathway protein E [xcp secretion system] [Pseudomonas aeruginosa PAO1]
(xcpR) general secretion pathway protein E [xcp secretion system] [Pseudomonas aeruginosa PAO1]
(xcpR) general secretion pathway protein E [xcp secretion system] [Pseudomonas aeruginosa PAO1]
(xcpR) general secretion pathway protein E [xcp secretion system] [Pseudomonas aeruginosa PAO1]
(xcpR) general secretion pathway protein E [xcp secretion system] [Pseudomonas aeruginosa PAO1]
(xcpR) general secretion pathway protein E [xcp secretion system] [Pseudomonas aeruginosa PAO1]
(xcpR) general secretion pathway protein E [xcp secretion system] [Pseudomonas aeruginosa PAO1]
(xcpR) general secretion pathway protein E [xcp secretion system] [Pseudomonas aeruginosa PAO1]
(xcpS) general secretion pathway protein F [xcp secretion system] [Pseudomonas aeruginosa PAO1]
(xcpS) general secretion pathway protein F [xcp secretion system] [Pseudomonas aeruginosa PAO1]
(xcpV) general secretion pathway protein I [xcp secretion system] [Pseudomonas aeruginosa PAO1]
(xcpV) general secretion pathway protein I [xcp secretion system] [Pseudomonas aeruginosa PAO1]
(xcpV) general secretion pathway protein I [xcp secretion system] [Pseudomonas aeruginosa PAO1]

## Sheet: LS1
Name	E-value	ID
(flhA) flagellar biosynthesis protein FlhA [Flagella] [Yersinia enterocolitica subsp. enterocolitica 8081]	0.0002	96.9% (31/32)
(pvdI) peptide synthase [pyoverdine] [Pseudomonas aeruginosa PAO1]	3e-06	96.2% (100/104)
(pvdJ) pyoverdine biosynthesis protein PvdJ [pyoverdine] [Pseudomonas aeruginosa PAO1]	4e-05	93.2% (69/74)
(IlpA) immunogenic lipoprotein A [IlpA] [Vibrio vulnificus YJ016]	6e-07	93.2% (41/44)
(vasH) type VI secretion system regulatory protein VasH [T6SS] [Vibrio cholerae O1 biovar El Tor str. N16961]	4e-05	92.5% (74/80)
(fliC) flagellin [Flagella] [Yersinia enterocolitica subsp. enterocolitica 8081]	0.0002	92.5% (37/40)
(gspG) general secretion pathway protein G [T2SS] [Shigella dysenteriae Sd197]	3e-09	91.0% (91/100)
(hcp-2) type VI secretion system substrate Hcp-2 [VAS] [Vibrio cholerae O1 biovar El Tor str. N16961]	3e-06	87.1% (108/124)
(cheD) methyl-accepting chemotaxis protein CheD [peritrichous flagella] [Yersinia enterocolitica subsp. enterocolitica 8081]	3e-12	87.0% (408/469)
(lpxD) UDP-3-O-(3-hydroxymyristoyl) glucosamine N-acyltransferase [LOS] [Haemophilus influenzae Rd KW20]	2e-07	86.8% (112/129)
(pilU) twitching motility protein PilU [Type IV pili] [Pseudomonas aeruginosa PAO1]	0.0002	86.7% (52/60)
(acfB) accessory colonization factor AcfB [ACF] [Vibrio cholerae O1 biovar El Tor str. N16961]	0.0002	86.5% (198/229)
(luxS) S-ribosylhomocysteinase [AI-2] [Vibrio cholerae O1 biovar El Tor str. N16961]	7e-19	86.3% (157/182)
(fliQ) flagellar biosynthetic protein FliQ [Flagella] [Pseudomonas aeruginosa PAO1]	1e-08	86.1% (68/79)
(fliP) flagellar biosynthetic protein FliP [Flagella] [Yersinia enterocolitica subsp. enterocolitica 8081]	6e-10	85.2% (132/155)
(tlpB) membrane-bound chemoreceptor sensing pH and autoinducer-2 [Pse5Ac7Ac] [Helicobacter pylori 26695]	3e-12	85.1% (149/175)
(mucP) metalloprotease protease [Alginate regulation] [Pseudomonas aeruginosa PAO1]	4e-05	84.9% (62/73)
(tssH-5/clpV) Clp-type ATPase chaperone protein [T6SS-1] [Burkholderia pseudomallei K96243]	2e-07	84.8% (134/158)
(tcpI) toxin co-regulated pilus biosynthesis protein I [TCP] [Vibrio cholerae O1 biovar El Tor str. N16961]	0.0002	84.8% (117/138)
(rfaD) ADP-L-glycero-D-mannoheptose-6-epimerase [LOS] [Haemophilus influenzae Rd KW20]	3e-18	84.7% (111/131)
(lpxC) UDP-3-O-(R-3-hydroxymyristoyl)-N-acetylglucosamine deacetylase [LOS] [Haemophilus influenzae Rd KW20]	1e-11	84.3% (91/108)
(vipB/mglB) type VI secretion system tubule-forming protein VipB [T6SS] [Vibrio cholerae O1 biovar El Tor str. N16961]	4e-60	83.8% (450/537)
(fliI) flagellum-specific ATP synthase FliI [Flagella] [Pseudomonas aeruginosa PAO1]	4e-05	83.8% (191/228)
(pilT) twitching motility protein PilT [Type IV pili] [Neisseria meningitidis MC58]	1e-17	83.8% (119/142)
(cheV3) chemotaxis coupling protein CheV3 [Pse5Ac7Ac] [Helicobacter pylori 26695]	4e-08	83.7% (82/98)
(ompA) outer membrane protein A [OmpA] [Escherichia coli O18:K1:H7 str. RS218]	4e-05	83.6% (138/165)
(fliN) flagellar motor switch protein FliN [Flagella] [Burkholderia pseudomallei K96243]	3e-06	83.2% (79/95)
(vgrG-2) type VI secretion system substrate VgrG-2 [VAS] [Vibrio cholerae O1 biovar El Tor str. N16961]	3e-09	82.9% (165/199)
(htpB) Hsp60, 60K heat shock protein HtpB [Hsp60] [Legionella pneumophila subsp. pneumophila str. Philadelphia 1]	3e-27	82.7% (484/585)
(gmhA/lpcA) phosphoheptose isomerase [LOS] [Haemophilus influenzae Rd KW20]	7e-19	82.4% (145/176)
(gspF) general secretion pathway protein F [T2SS] [Shigella dysenteriae Sd197]	4e-11	82.3% (293/356)
(tlpC) membrane-bound chemoreceptor [Pse5Ac7Ac] [Helicobacter pylori 26695]	0.0002	82.0% (82/100)
(fliM) flagellar motor switch protein FliM [Flagella] [Pseudomonas aeruginosa PAO1]	2e-07	81.6% (102/125)
(gspE) general secretion pathway protein E [T2SS] [Shigella dysenteriae Sd197]	2e-37	81.5% (920/1129)
(clpB/vasG) type VI secretion system AAA+ family ATPase [T6SS] [Vibrio cholerae O1 biovar El Tor str. N16961]	2e-16	81.4% (380/467)
(katB) catalase-peroxidase KatB [KatAB] [Legionella pneumophila subsp. pneumophila str. Philadelphia 1]	1e-32	81.4% (350/430)
(mgtB) Mg2+ transport protein [MgtBC] [Salmonella enterica subsp. enterica serovar Typhimurium str. LT2]	3e-09	81.1% (146/180)
(xcpR) general secretion pathway protein E [xcp secretion system] [Pseudomonas aeruginosa PAO1]	2e-19	81.0% (281/347)
(kdsA) 2-dehydro-3-deoxyphosphooctonate aldolase [LOS] [Haemophilus influenzae Rd KW20]	4e-14	80.7% (259/321)
(fliR) flagellar biosynthetic protein FliR [Flagella] [Pseudomonas aeruginosa PAO1]	4e-05	80.3% (110/137)
(katA) catalase [KatA] [Neisseria meningitidis MC58]	4e-20	80.2% (413/515)
(gspD) general secretion pathway protein D [T2SS] [Shigella dysenteriae Sd197]	1e-84	80.1% (1848/2307)
(pilT) twitching motility protein PilT [Type IV pili] [Pseudomonas aeruginosa PAO1]	2e-25	79.5% (314/395)

## Sheet: FM82
Name	E-value	ID
(pvdJ) pyoverdine biosynthesis protein PvdJ [pyoverdine] [Pseudomonas aeruginosa PAO1]	2e-05	98.2% (54/55)
(gspG) general secretion pathway protein G [T2SS] [Shigella dysenteriae Sd197]	5e-06	96.9% (31/32)
(pvdI) peptide synthase [pyoverdine] [Pseudomonas aeruginosa PAO1]	5e-06	95.6% (87/91)
(cdsV) Type III secretion protein CdsV [TTSS] [Chlamydia trachomatis D/UW-3/CX]	2e-05	94.3% (33/35)
(fliC) flagellin [Flagella] [Yersinia enterocolitica subsp. enterocolitica 8081]	0.0001	94.1% (32/34)
(flhA) flagellar biosynthesis protein FlhA [Flagella] [Yersinia enterocolitica subsp. enterocolitica 8081]	5e-06	91.7% (77/84)
(ccmF) cytochrome c heme lyase subunit CcmF [Cytochrome c muturation (ccm) locus] [Legionella pneumophila subsp. pneumophila str. Philadelphia 1]	1e-06	91.5% (75/82)
(rffG) dTDP-glucose 46-dehydratase [LOS] [Haemophilus influenzae Rd KW20]	5e-06	91.1% (72/79)
(IlpA) immunogenic lipoprotein A [IlpA] [Vibrio vulnificus YJ016]	2e-09	89.5% (51/57)
(spaP) type III secretion system minor export apparatus protein SpaP [TTSS(SPI-1 encode)] [Salmonella enterica subsp. enterica serovar Typhimurium str. LT2]	2e-05	89.4% (42/47)
(ccmC) cytochrome c-type biogenesis protein CcmC, putative heme lyase for CcmE [CcmC] [Legionella pneumophila subsp. pneumophila str. Philadelphia 1]	1e-08	89.3% (50/56)
(tssH-5/clpV) Clp-type ATPase chaperone protein [T6SS-1] [Burkholderia pseudomallei K96243]	2e-09	87.7% (57/65)
(fliQ) flagellar biosynthetic protein FliQ [Flagella] [Pseudomonas aeruginosa PAO1]	1e-08	86.8% (59/68)
(pilU) twitching motility protein PilU [Type IV pili] [Pseudomonas aeruginosa PAO1]	5e-06	86.7% (52/60)
(cheD) methyl-accepting chemotaxis protein CheD [peritrichous flagella] [Yersinia enterocolitica subsp. enterocolitica 8081]	2e-20	86.5% (428/495)
(tsr) methyl-accepting chemotaxis protein I [Flagella] [Burkholderia pseudomallei K96243]	5e-08	86.5% (166/192)
(lpxD) UDP-3-O-(3-hydroxymyristoyl) glucosamine N-acyltransferase [LOS] [Haemophilus influenzae Rd KW20]	1e-06	86.0% (111/129)
(icl) Isocitrate lyase Icl (isocitrase) (isocitratase) [Isocitrate lyase] [Mycobacterium tuberculosis H37Rv]	5e-06	85.9% (55/64)
(fliP) flagellar biosynthetic protein FliP [Flagella] [Yersinia enterocolitica subsp. enterocolitica 8081]	1e-14	85.8% (133/155)
(fliN) flagellar motor switch protein FliN [Flagella] [Burkholderia pseudomallei K96243]	3e-13	85.3% (81/95)
(fliI) flagellum-specific ATP synthase FliI [Flagella] [Yersinia enterocolitica subsp. enterocolitica 8081]	3e-13	85.3% (81/95)
(clpC) endopeptidase Clp ATP-binding chain C [ClpC] [Listeria monocytogenes EGD-e]	2e-07	85.0% (113/133)
(gspE) general secretion pathway protein E [T2SS] [Shigella dysenteriae Sd197]	2e-18	84.8% (295/348)
(lpxC) UDP-3-O-(R-3-hydroxymyristoyl)-N-acetylglucosamine deacetylase [LOS] [Haemophilus influenzae Rd KW20]	6e-14	84.3% (91/108)
(ompA) outer membrane protein A [OmpA] [Escherichia coli O18:K1:H7 str. RS218]	1e-06	83.6% (138/165)
(htpB) Hsp60, 60K heat shock protein HtpB [Hsp60] [Legionella pneumophila subsp. pneumophila str. Philadelphia 1]	1e-37	83.5% (330/395)
(fliM) flagellar motor switch protein FliM [Flagella] [Pseudomonas aeruginosa PAO1]	6e-14	82.8% (106/128)
(vgrG-3) type VI secretion system effector VgrG-3 protein, lysozyme-like activity, VgrG-3 and TsaB are a toxin-antitoxin complex [T6SS] [Vibrio cholerae O1 biovar El Tor str. N16961]	1e-08	82.7% (86/104)
(vipB/mglB) type VI secretion system tubule-forming protein VipB [T6SS] [Vibrio cholerae O1 biovar El Tor str. N16961]	1e-56	82.6% (462/559)
(clpB/vasG) type VI secretion system AAA+ family ATPase [T6SS] [Vibrio cholerae O1 biovar El Tor str. N16961]	8e-22	82.4% (426/517)
(gmhA/lpcA) phosphoheptose isomerase [LOS] [Haemophilus influenzae Rd KW20]	8e-22	82.4% (145/176)
(gspD) general secretion pathway protein D [T2SS] [Shigella dysenteriae Sd197]	8e-68	82.3% (673/818)
(xcpR) general secretion pathway protein E [xcp secretion system] [Pseudomonas aeruginosa PAO1]	2e-22	82.3% (288/350)
(katB) catalase-peroxidase KatB [KatAB] [Legionella pneumophila subsp. pneumophila str. Philadelphia 1]	5e-33	82.0% (401/489)
(neuB1) sialic acid synthase [LOS] [Campylobacter jejuni subsp. jejuni NCTC 11168]	2e-05	81.3% (87/107)
(kdsA) 2-dehydro-3-deoxyphosphooctonate aldolase [LOS] [Haemophilus influenzae Rd KW20]	3e-19	81.0% (260/321)
(mgtB) Mg2+ transport protein [MgtBC] [Salmonella enterica subsp. enterica serovar Typhimurium str. LT2]	7e-16	81.0% (145/179)
(rfaD) ADP-L-glycero-D-mannoheptose-6-epimerase [LOS] [Haemophilus influenzae Rd KW20]	8e-22	80.8% (181/224)
(vasH) type VI secretion system regulatory protein VasH [T6SS] [Vibrio cholerae O1 biovar El Tor str. N16961]	2e-07	80.0% (120/150)
(katA) catalase [KatA] [Neisseria meningitidis MC58]	2e-28	79.7% (378/474)
(luxS) S-ribosylhomocysteinase [AI-2] [Vibrio cholerae O1 biovar El Tor str. N16961]	2e-22	79.6% (227/285)

## Sheet: CAPA010
Name	E-value	ID
(pvdJ) pyoverdine biosynthesis protein PvdJ [pyoverdine] [Pseudomonas aeruginosa PAO1]	1e-06	93.2% (69/74)
(IlpA) immunogenic lipoprotein A [IlpA] [Vibrio vulnificus YJ016]	1e-08	93.2% (41/44)
(icl) Isocitrate lyase Icl (isocitrase) (isocitratase) [Isocitrate lyase] [Mycobacterium tuberculosis H37Rv]	1e-06	92.7% (38/41)
(fliC) flagellin [Flagella] [Yersinia enterocolitica subsp. enterocolitica 8081]	5e-06	92.5% (37/40)
(gspG) general secretion pathway protein G [T2SS] [Shigella dysenteriae Sd197]	6e-10	90.9% (150/165)
(vasH) type VI secretion system regulatory protein VasH [T6SS] [Vibrio cholerae O1 biovar El Tor str. N16961]	1e-06	90.6% (77/85)
(ccmC) cytochrome c-type biogenesis protein CcmC, putative heme lyase for CcmE [CcmC] [Legionella pneumophila subsp. pneumophila str. Philadelphia 1]	1e-08	89.3% (50/56)
(gmd) GDP-mannose 4,6-dehydratase [LPS] [Brucella melitensis bv. 1 str. 16M]	6e-12	89.2% (58/65)
(hcp-2) type VI secretion system substrate Hcp-2 [VAS] [Vibrio cholerae O1 biovar El Tor str. N16961]	6e-10	89.1% (147/165)
(acfB) accessory colonization factor AcfB [ACF] [Vibrio cholerae O1 biovar El Tor str. N16961]	3e-11	88.2% (60/68)
(pilE/pilA) type IV pilus assembly protein, major pilin [type IV pili] [Legionella pneumophila subsp. pneumophila str. Philadelphia 1]	6e-14	87.5% (70/80)
(fliQ) flagellar biosynthetic protein FliQ [Flagella] [Pseudomonas aeruginosa PAO1]	1e-08	86.8% (59/68)
(lpxD) UDP-3-O-(3-hydroxymyristoyl) glucosamine N-acyltransferase [LOS] [Haemophilus influenzae Rd KW20]	3e-09	86.8% (112/129)
(mucP) metalloprotease protease [Alginate regulation] [Pseudomonas aeruginosa PAO1]	3e-09	86.3% (63/73)
(cheD) methyl-accepting chemotaxis protein CheD [peritrichous flagella] [Yersinia enterocolitica subsp. enterocolitica 8081]	3e-15	86.3% (572/663)
(pilT) twitching motility protein PilT [Type IV pili] [Neisseria meningitidis MC58]	7e-16	86.3% (145/168)
(fliI) flagellum-specific ATP synthase FliI [Flagella] [Yersinia enterocolitica subsp. enterocolitica 8081]	3e-13	86.1% (186/216)
(tssH-5/clpV) Clp-type ATPase chaperone protein [T6SS-1] [Burkholderia pseudomallei K96243]	6e-12	86.1% (136/158)
(fliN) flagellar motor switch protein FliN [Flagella] [Burkholderia pseudomallei K96243]	3e-13	85.3% (81/95)
(luxS) S-ribosylhomocysteinase [AI-2] [Vibrio cholerae O1 biovar El Tor str. N16961]	8e-22	85.1% (183/215)
(fliP) flagellar biosynthetic protein FliP [Flagella] [Pseudomonas aeruginosa PAO1]	7e-41	84.7% (283/334)
(ompA) outer membrane protein A [OmpA] [Escherichia coli O18:K1:H7 str. RS218]	1e-06	84.7% (177/209)
(lpxC) UDP-3-O-(R-3-hydroxymyristoyl)-N-acetylglucosamine deacetylase [LOS] [Haemophilus influenzae Rd KW20]	6e-14	84.3% (91/108)
(gmhA/lpcA) phosphoheptose isomerase [LOS] [Haemophilus influenzae Rd KW20]	5e-27	83.5% (147/176)
(msbA) lipid transporter ATP-binding/permease [LOS] [Haemophilus influenzae Rd KW20]	2e-07	83.3% (75/90)
(vipB/mglB) type VI secretion system tubule-forming protein VipB [T6SS] [Vibrio cholerae O1 biovar El Tor str. N16961]	2e-64	83.1% (487/586)
(flhA) flagellar biosynthesis protein FlhA [Flagella] [Burkholderia pseudomallei K96243]	1e-33	83.0% (426/513)
(htpB) Hsp60, 60K heat shock protein HtpB [Hsp60] [Legionella pneumophila subsp. pneumophila str. Philadelphia 1]	1e-31	82.7% (503/608)
(katA) catalase [KatA] [Neisseria meningitidis MC58]	4e-25	82.2% (392/477)
(clpB/vasG) type VI secretion system AAA+ family ATPase [T6SS] [Vibrio cholerae O1 biovar El Tor str. N16961]	4e-19	82.1% (436/531)
(mgtB) Mg2+ transport protein [MgtBC] [Salmonella enterica subsp. enterica serovar Typhimurium str. LT2]	3e-15	82.0% (146/178)
(gspE) general secretion pathway protein E [T2SS] [Shigella dysenteriae Sd197]	9e-45	81.6% (1041/1276)
(fliM) flagellar motor switch protein FliM [Flagella] [Pseudomonas aeruginosa PAO1]	3e-09	81.6% (102/125)
(gspF) general secretion pathway protein F [T2SS] [Shigella dysenteriae Sd197]	7e-16	81.4% (227/279)
(gspD) general secretion pathway protein D [T2SS] [Shigella dysenteriae Sd197]	2e-74	81.1% (1752/2159)
(xcpR) general secretion pathway protein E [xcp secretion system] [Pseudomonas aeruginosa PAO1]	1e-27	81.0% (426/526)
(vgrG-2) type VI secretion system substrate VgrG-2 [VAS] [Vibrio cholerae O1 biovar El Tor str. N16961]	6e-14	81.0% (222/274)
(kdsA) 2-dehydro-3-deoxyphosphooctonate aldolase [LOS] [Haemophilus influenzae Rd KW20]	6e-14	80.8% (235/291)
(rfaD) ADP-L-glycero-D-mannoheptose-6-epimerase [LOS] [Haemophilus influenzae Rd KW20]	8e-22	80.8% (181/224)
(katB) catalase-peroxidase KatB [KatAB] [Legionella pneumophila subsp. pneumophila str. Philadelphia 1]	7e-39	80.6% (561/696)
(fliR) flagellar biosynthetic protein FliR [Flagella] [Pseudomonas aeruginosa PAO1]	1e-06	80.3% (110/137)
(fcl) GDP-fucose synthetase [O-antigen] [Yersinia enterocolitica subsp. enterocolitica 8081]	3e-17	78.8% (231/293)

## Sheet: CAPA003
Name	E-value	ID
(pvdI) peptide synthase [pyoverdine] [Pseudomonas aeruginosa PAO1]	5e-06	95.7% (89/93)
(flgR) sigma-54 associated transcriptional activator [Pse5Ac7Ac, Pse5Ac7Am, Pse8OAc, Pse5Am7AcGlnAc] [Campylobacter jejuni subsp. jejuni NCTC 11168]	3e-07	94.7% (36/38)
(flgI) flagellar P-ring protein precursor FlgI [Flagella] [Pseudomonas aeruginosa PAO1]	0.0001	94.1% (32/34)
(gspG) general secretion pathway protein G [T2SS] [Shigella dysenteriae Sd197]	5e-06	94.0% (63/67)
(IlpA) immunogenic lipoprotein A [IlpA] [Vibrio vulnificus YJ016]	1e-08	93.2% (41/44)
(fliC) flagellin [Flagella] [Yersinia enterocolitica subsp. enterocolitica 8081]	5e-06	92.5% (37/40)
(flgG) flagellar basal-body rod protein FlgG [Flagella] [Pseudomonas aeruginosa PAO1]	0.0001	89.1% (41/46)
(mucD) serine protease MucD precursor [Alginate regulation] [Pseudomonas aeruginosa PAO1]	3e-07	87.9% (51/58)
(tsr) methyl-accepting chemotaxis protein I [Flagella] [Burkholderia pseudomallei K96243]	6e-10	87.9% (109/124)
(icl) Isocitrate lyase Icl (isocitrase) (isocitratase) [Isocitrate lyase] [Mycobacterium tuberculosis H37Rv]	1e-08	87.5% (56/64)
(ccmC) cytochrome c-type biogenesis protein CcmC, putative heme lyase for CcmE [CcmC] [Legionella pneumophila subsp. pneumophila str. Philadelphia 1]	5e-06	87.5% (49/56)
(fliQ) flagellar biosynthetic protein FliQ [Flagella] [Pseudomonas aeruginosa PAO1]	1e-08	86.8% (59/68)
(lpxD) UDP-3-O-(3-hydroxymyristoyl) glucosamine N-acyltransferase [LOS] [Haemophilus influenzae Rd KW20]	3e-09	86.8% (112/129)
(cap8G) capsular polysaccharide synthesis enzyme Cap8G [Capsule] [Staphylococcus aureus subsp. aureus MW2]	1e-10	86.7% (65/75)
(pilU) twitching motility protein PilU [Type IV pili] [Pseudomonas aeruginosa PAO1]	5e-06	86.7% (52/60)
(cheD) methyl-accepting chemotaxis protein CheD [peritrichous flagella] [Yersinia enterocolitica subsp. enterocolitica 8081]	3e-15	86.5% (550/636)
(mtrD) multiple transferable resistance system protein MtrD [MtrCDE] [Neisseria meningitidis MC58]	3e-07	86.4% (57/66)
(fliN) flagellar motor switch protein FliN [Flagella] [Burkholderia pseudomallei K96243]	7e-16	86.3% (82/95)
(fleQ) transcriptional regulator FleQ [polar flagella] [Legionella pneumophila subsp. pneumophila str. Philadelphia 1]	2e-05	86.3% (145/168)
(luxS) S-ribosylhomocysteinase [AI-2] [Vibrio cholerae O1 biovar El Tor str. N16961]	9e-22	86.0% (153/178)
(fliI) flagellum-specific ATP synthase FliI [Flagella] [Yersinia enterocolitica subsp. enterocolitica 8081]	3e-13	85.9% (183/213)
(fliP) flagellar biosynthetic protein FliP [Flagella] [Yersinia enterocolitica subsp. enterocolitica 8081]	2e-14	85.8% (133/155)
(mgtB) Mg2+ transport protein [MgtBC] [Salmonella enterica subsp. enterica serovar Typhimurium str. LT2]	3e-13	85.7% (78/91)
(flhA) flagellar biosynthesis protein FlhA [Flagella] [Pseudomonas aeruginosa PAO1]	1e-54	85.7% (592/691)
(clpC) endopeptidase Clp ATP-binding chain C [ClpC] [Listeria monocytogenes EGD-e]	3e-07	85.0% (113/133)
(mucP) metalloprotease protease [Alginate regulation] [Pseudomonas aeruginosa PAO1]	1e-06	84.9% (62/73)
(fliM) flagellar motor switch protein FliM [Flagella] [Pseudomonas aeruginosa PAO1]	2e-05	84.5% (60/71)
(ompA) outer membrane protein A [OmpA] [Escherichia coli O18:K1:H7 str. RS218]	3e-09	84.2% (139/165)
(gmhA/lpcA) phosphoheptose isomerase [LOS] [Haemophilus influenzae Rd KW20]	1e-29	84.1% (148/176)
(pilT) twitching motility protein PilT [Type IV pili] [Neisseria meningitidis MC58]	2e-14	83.7% (118/141)
(xcpR) general secretion pathway protein E [xcp secretion system] [Pseudomonas aeruginosa PAO1]	1e-27	83.2% (154/185)
(pilA) type 4 fimbrial precursor PilA [Type IV pili] [Pseudomonas aeruginosa PAO1]	2e-05	83.1% (69/83)
(lgtF) beta-1,4-glucosyltransferase [LOS] [Haemophilus influenzae Rd KW20]	2e-05	82.8% (72/87)
(htpB) Hsp60, 60K heat shock protein HtpB [Hsp60] [Legionella pneumophila subsp. pneumophila str. Philadelphia 1]	4e-40	82.6% (546/661)
(katA) catalase [KatA] [Neisseria meningitidis MC58]	1e-27	82.6% (394/477)
(lpxC) UDP-3-O-(R-3-hydroxymyristoyl)-N-acetylglucosamine deacetylase [LOS] [Haemophilus influenzae Rd KW20]	1e-08	82.4% (89/108)
(katB) catalase-peroxidase KatB [KatAB] [Legionella pneumophila subsp. pneumophila str. Philadelphia 1]	2e-39	82.2% (396/482)
(gspD) general secretion pathway protein D [T2SS] [Shigella dysenteriae Sd197]	3e-55	81.5% (645/791)
(kdsA) 2-dehydro-3-deoxyphosphooctonate aldolase [LOS] [Haemophilus influenzae Rd KW20]	2e-16	81.0% (260/321)
(rfaD) ADP-L-glycero-D-mannoheptose-6-epimerase [LOS] [Haemophilus influenzae Rd KW20]	9e-22	80.8% (181/224)
(gspE) general secretion pathway protein E [T2SS] [Shigella dysenteriae Sd197]	2e-24	80.5% (538/668)

## Sheet: V78
Name	E-value	ID
(cdsV) Type III secretion protein CdsV [TTSS] [Chlamydia trachomatis D/UW-3/CX]	6e-05	94.3% (33/35)
(fliC) flagellin [Flagella] [Yersinia enterocolitica subsp. enterocolitica 8081]	1e-05	92.5% (37/40)
(flhA) flagellar biosynthesis protein FlhA [Flagella] [Yersinia enterocolitica subsp. enterocolitica 8081]	1e-05	91.7% (77/84)
(gspG) general secretion pathway protein G [T2SS] [Shigella dysenteriae Sd197]	1e-10	91.0% (91/100)
(ccmC) cytochrome c-type biogenesis protein CcmC, putative heme lyase for CcmE [CcmC] [Legionella pneumophila subsp. pneumophila str. Philadelphia 1]	8e-09	89.5% (51/57)
(spaP) type III secretion system minor export apparatus protein SpaP [TTSS(SPI-1 encode)] [Salmonella enterica subsp. enterica serovar Typhimurium str. LT2]	6e-05	89.4% (42/47)
(hcp-2) type VI secretion system substrate Hcp-2 [VAS] [Vibrio cholerae O1 biovar El Tor str. N16961]	7e-07	89.3% (92/103)
(tviB) Vi polysaccharide biosynthesis protein, UDP-glucose/GDP-mannose dehydrogenase TviB [Vi antigen] [Salmonella enterica subsp. enterica serovar Typhi str. CT18]	2e-07	89.1% (49/55)
(flgG) flagellar basal-body rod protein FlgG [Flagella] [Pseudomonas aeruginosa PAO1]	0.0003	89.1% (41/46)
(fliP) flagellar biosynthetic protein FliP [Flagella] [Legionella pneumophila subsp. pneumophila str. Philadelphia 1]	0.0003	88.0% (44/50)
(mucD) serine protease MucD precursor [Alginate regulation] [Pseudomonas aeruginosa PAO1]	7e-07	87.9% (51/58)
(IlpA) immunogenic lipoprotein A [IlpA] [Vibrio vulnificus YJ016]	3e-06	87.7% (50/57)
(cheD) methyl-accepting chemotaxis protein CheD [peritrichous flagella] [Yersinia enterocolitica subsp. enterocolitica 8081]	1e-12	87.6% (454/518)
(lpxD) UDP-3-O-(3-hydroxymyristoyl) glucosamine N-acyltransferase [LOS] [Haemophilus influenzae Rd KW20]	8e-09	86.8% (112/129)
(fliQ) flagellar biosynthetic protein FliQ [Flagella] [Pseudomonas aeruginosa PAO1]	4e-10	86.6% (110/127)
(pilT) twitching motility protein PilT [Type IV pili] [Neisseria meningitidis MC58]	4e-17	86.2% (144/167)
(fliN) flagellar motor switch protein FliN [Flagella] [Burkholderia pseudomallei K96243]	1e-12	85.3% (81/95)
(clpC) endopeptidase Clp ATP-binding chain C [ClpC] [Listeria monocytogenes EGD-e]	6e-05	85.0% (113/133)
(mucP) metalloprotease protease [Alginate regulation] [Pseudomonas aeruginosa PAO1]	3e-06	84.9% (62/73)
(fbpC) iron(III) ABC transporter, ATP-binding protein [FbpABC] [Neisseria meningitidis MC58]	0.0003	84.8% (56/66)
(mtrD) multiple transferable resistance system protein MtrD [MtrCDE] [Neisseria meningitidis MC58]	0.0003	84.8% (56/66)
(ompA) outer membrane protein A [OmpA] [Escherichia coli O18:K1:H7 str. RS218]	3e-06	84.7% (177/209)
(lpxC) UDP-3-O-(R-3-hydroxymyristoyl)-N-acetylglucosamine deacetylase [LOS] [Haemophilus influenzae Rd KW20]	3e-13	84.3% (91/108)
(htpB) Hsp60, 60K heat shock protein HtpB [Hsp60] [Legionella pneumophila subsp. pneumophila str. Philadelphia 1]	3e-31	84.3% (403/478)
(tcpI) toxin co-regulated pilus biosynthesis protein I [TCP] [Vibrio cholerae O1 biovar El Tor str. N16961]	1e-05	84.3% (172/204)
(katA) catalase [KatA] [Neisseria meningitidis MC58]	8e-27	83.2% (430/517)
(rffG) dTDP-glucose 46-dehydratase [LOS] [Haemophilus influenzae Rd KW20]	4e-08	83.0% (83/100)
(gspF) general secretion pathway protein F [T2SS] [Shigella dysenteriae Sd197]	8e-18	83.0% (288/347)
(lgtF) beta-1,4-glucosyltransferase [LOS] [Haemophilus influenzae Rd KW20]	6e-05	82.8% (72/87)
(katB) catalase-peroxidase KatB [KatAB] [Legionella pneumophila subsp. pneumophila str. Philadelphia 1]	3e-24	82.3% (339/412)
(fliI) flagellum-specific ATP synthase FliI [Flagella] [Yersinia enterocolitica subsp. enterocolitica 8081]	6e-05	82.1% (78/95)
(gmhA/lpcA) phosphoheptose isomerase [LOS] [Haemophilus influenzae Rd KW20]	4e-19	82.1% (142/173)
(gspD) general secretion pathway protein D [T2SS] [Shigella dysenteriae Sd197]	4e-82	81.1% (1759/2170)
(kdsA) 2-dehydro-3-deoxyphosphooctonate aldolase [LOS] [Haemophilus influenzae Rd KW20]	2e-18	81.0% (260/321)
(rfaD) ADP-L-glycero-D-mannoheptose-6-epimerase [LOS] [Haemophilus influenzae Rd KW20]	5e-21	80.8% (181/224)
(fliM) flagellar motor switch protein FliM [Flagella] [Pseudomonas aeruginosa PAO1]	3e-06	80.8% (101/125)
(luxS) S-ribosylhomocysteinase [AI-2] [Vibrio cholerae O1 biovar El Tor str. N16961]	3e-24	80.4% (229/285)
(mgtB) Mg2+ transport protein [MgtBC] [Salmonella enterica subsp. enterica serovar Typhimurium str. LT2]	4e-10	80.4% (144/179)
(gspE) general secretion pathway protein E [T2SS] [Shigella dysenteriae Sd197]	3e-42	80.0% (1037/1296)
(xcpR) general secretion pathway protein E [xcp secretion system] [Pseudomonas aeruginosa PAO1]	3e-24	79.7% (622/780)
(vgrG-2) type VI secretion system substrate VgrG-2 [VAS] [Vibrio cholerae O1 biovar El Tor str. N16961]	4e-08	78.8% (186/236)

## Sheet: MS17-188
Name	E-value	ID
(vasH) type VI secretion system regulatory protein VasH [T6SS] [Vibrio cholerae O1 biovar El Tor str. N16961]	1e-06	97.0% (32/33)
(IlpA) immunogenic lipoprotein A [IlpA] [Vibrio vulnificus YJ016]	1e-08	93.2% (41/44)
(gspG) general secretion pathway protein G [T2SS] [Shigella dysenteriae Sd197]	7e-14	93.0% (119/128)
(fliC) flagellin [Flagella] [Yersinia enterocolitica subsp. enterocolitica 8081]	5e-06	92.5% (37/40)
(ccmF) cytochrome c heme lyase subunit CcmF [Cytochrome c muturation (ccm) locus] [Legionella pneumophila subsp. pneumophila str. Philadelphia 1]	1e-06	90.8% (79/87)
(hcp-2) type VI secretion system substrate Hcp-2 [VAS] [Vibrio cholerae O1 biovar El Tor str. N16961]	6e-31	90.1% (338/375)
(ccmC) cytochrome c-type biogenesis protein CcmC, putative heme lyase for CcmE [CcmC] [Legionella pneumophila subsp. pneumophila str. Philadelphia 1]	1e-08	89.3% (50/56)
(fleQ) transcriptional regulator FleQ [polar flagella] [Legionella pneumophila subsp. pneumophila str. Philadelphia 1]	1e-08	89.1% (90/101)
(mucD) serine protease MucD precursor [Alginate regulation] [Pseudomonas aeruginosa PAO1]	3e-07	87.9% (51/58)
(tviB) Vi polysaccharide biosynthesis protein, UDP-glucose/GDP-mannose dehydrogenase TviB [Vi antigen] [Salmonella enterica subsp. enterica serovar Typhi str. CT18]	3e-09	87.7% (57/65)
(lpxD) UDP-3-O-(3-hydroxymyristoyl) glucosamine N-acyltransferase [LOS] [Haemophilus influenzae Rd KW20]	3e-09	86.8% (112/129)
(vgrG-3) type VI secretion system effector VgrG-3 protein, lysozyme-like activity, VgrG-3 and TsaB are a toxin-antitoxin complex [T6SS] [Vibrio cholerae O1 biovar El Tor str. N16961]	3e-07	86.4% (57/66)
(galE) UDP-glucose 4-epimerase [LOS] [Haemophilus influenzae Rd KW20]	3e-07	86.4% (114/132)
(mucP) metalloprotease protease [Alginate regulation] [Pseudomonas aeruginosa PAO1]	3e-09	86.3% (63/73)
(pilT) twitching motility protein PilT [Type IV pili] [Neisseria meningitidis MC58]	8e-16	86.3% (145/168)
(fliI) flagellum-specific ATP synthase FliI [Flagella] [Yersinia enterocolitica subsp. enterocolitica 8081]	8e-16	86.0% (135/157)
(cheD) methyl-accepting chemotaxis protein CheD [peritrichous flagella] [Yersinia enterocolitica subsp. enterocolitica 8081]	8e-18	85.7% (514/600)
(clpC) endopeptidase Clp ATP-binding chain C [ClpC] [Listeria monocytogenes EGD-e]	3e-07	85.7% (114/133)
(fliN) flagellar motor switch protein FliN [Flagella] [Burkholderia pseudomallei K96243]	3e-13	85.3% (81/95)
(mgtB) Mg2+ transport protein [MgtBC] [Salmonella enterica subsp. enterica serovar Typhimurium str. LT2]	3e-11	85.2% (75/88)
(tssH-5/clpV) Clp-type ATPase chaperone protein [T6SS-1] [Burkholderia pseudomallei K96243]	3e-09	85.2% (121/142)
(fliP) flagellar biosynthetic protein FliP [Flagella] [Pseudomonas aeruginosa PAO1]	9e-41	85.1% (285/335)
(ompA) outer membrane protein A [OmpA] [Escherichia coli O18:K1:H7 str. RS218]	1e-06	84.7% (177/209)
(htpB) Hsp60, 60K heat shock protein HtpB [Hsp60] [Legionella pneumophila subsp. pneumophila str. Philadelphia 1]	2e-33	84.5% (397/470)
(luxS) S-ribosylhomocysteinase [AI-2] [Vibrio cholerae O1 biovar El Tor str. N16961]	4e-19	84.3% (194/230)
(lpxC) UDP-3-O-(R-3-hydroxymyristoyl)-N-acetylglucosamine deacetylase [LOS] [Haemophilus influenzae Rd KW20]	3e-11	83.3% (90/108)
(fliM) flagellar motor switch protein FliM [Flagella] [Pseudomonas aeruginosa PAO1]	2e-14	83.2% (104/125)
(msbA) lipid transporter ATP-binding/permease [LOS] [Haemophilus influenzae Rd KW20]	1e-06	83.1% (74/89)
(gmhA/lpcA) phosphoheptose isomerase [LOS] [Haemophilus influenzae Rd KW20]	2e-24	83.0% (146/176)
(vipB/mglB) type VI secretion system tubule-forming protein VipB [T6SS] [Vibrio cholerae O1 biovar El Tor str. N16961]	5e-65	82.8% (509/615)
(xcpR) general secretion pathway protein E [xcp secretion system] [Pseudomonas aeruginosa PAO1]	2e-20	82.8% (327/395)
(vgrG-2) type VI secretion system substrate VgrG-2 [VAS] [Vibrio cholerae O1 biovar El Tor str. N16961]	2e-18	82.6% (376/455)
(icl) Isocitrate lyase Icl (isocitrase) (isocitratase) [Isocitrate lyase] [Mycobacterium tuberculosis H37Rv]	3e-11	82.3% (102/124)
(katB) catalase-peroxidase KatB [KatAB] [Legionella pneumophila subsp. pneumophila str. Philadelphia 1]	7e-33	82.0% (387/472)
(katA) catalase [KatA] [Neisseria meningitidis MC58]	5e-25	81.5% (349/428)
(gspE) general secretion pathway protein E [T2SS] [Shigella dysenteriae Sd197]	2e-43	81.2% (939/1157)
(flhA) flagellar biosynthesis protein FlhA [Flagella] [Burkholderia pseudomallei K96243]	1e-25	81.2% (393/484)
(kdsA) 2-dehydro-3-deoxyphosphooctonate aldolase [LOS] [Haemophilus influenzae Rd KW20]	4e-19	81.0% (260/321)
(clpB/vasG) type VI secretion system AAA+ family ATPase [T6SS] [Vibrio cholerae O1 biovar El Tor str. N16961]	1e-12	80.9% (378/467)
(rfaD) ADP-L-glycero-D-mannoheptose-6-epimerase [LOS] [Haemophilus influenzae Rd KW20]	1e-21	80.8% (181/224)
(gspF) general secretion pathway protein F [T2SS] [Shigella dysenteriae Sd197]	3e-13	80.7% (230/285)
(gspD) general secretion pathway protein D [T2SS] [Shigella dysenteriae Sd197]	e-109	80.3% (1871/2331)

## Sheet: 7A
Name	E-value	ID
(vasH) type VI secretion system regulatory protein VasH [T6SS] [Vibrio cholerae O1 biovar El Tor str. N16961]	5e-06	95.2% (60/63)
(cdsV) Type III secretion protein CdsV [TTSS] [Chlamydia trachomatis D/UW-3/CX]	2e-05	94.3% (33/35)
(fliC) flagellin [Flagella] [Yersinia enterocolitica subsp. enterocolitica 8081]	0.0001	94.1% (32/34)
(pvdJ) pyoverdine biosynthesis protein PvdJ [pyoverdine] [Pseudomonas aeruginosa PAO1]	0.0001	92.1% (35/38)
(flhA) flagellar biosynthesis protein FlhA [Flagella] [Yersinia enterocolitica subsp. enterocolitica 8081]	5e-06	91.7% (77/84)
(gspG) general secretion pathway protein G [T2SS] [Shigella dysenteriae Sd197]	3e-11	91.1% (123/135)
(IlpA) immunogenic lipoprotein A [IlpA] [Vibrio vulnificus YJ016]	3e-09	89.5% (51/57)
(spaP) type III secretion system minor export apparatus protein SpaP [TTSS(SPI-1 encode)] [Salmonella enterica subsp. enterica serovar Typhimurium str. LT2]	2e-05	89.4% (42/47)
(pilE/pilA) type IV pilus assembly protein, major pilin [type IV pili] [Legionella pneumophila subsp. pneumophila str. Philadelphia 1]	2e-16	88.8% (71/80)
(ccmC) cytochrome c-type biogenesis protein CcmC, putative heme lyase for CcmE [CcmC] [Legionella pneumophila subsp. pneumophila str. Philadelphia 1]	5e-06	87.5% (49/56)
(fliQ) flagellar biosynthetic protein FliQ [Flagella] [Pseudomonas aeruginosa PAO1]	1e-10	87.3% (103/118)
(mucD) serine protease MucD precursor [Alginate regulation] [Pseudomonas aeruginosa PAO1]	0.0001	87.0% (47/54)
(fliN) flagellar motor switch protein FliN [Flagella] [Burkholderia pseudomallei K96243]	7e-16	86.3% (82/95)
(tssH-5/clpV) Clp-type ATPase chaperone protein [T6SS-1] [Burkholderia pseudomallei K96243]	6e-12	86.1% (136/158)
(lpxD) UDP-3-O-(3-hydroxymyristoyl) glucosamine N-acyltransferase [LOS] [Haemophilus influenzae Rd KW20]	1e-06	86.0% (111/129)
(fliM) flagellar motor switch protein FliM [Flagella] [Pseudomonas aeruginosa PAO1]	5e-08	85.9% (61/71)
(icl) Isocitrate lyase Icl (isocitrase) (isocitratase) [Isocitrate lyase] [Mycobacterium tuberculosis H37Rv]	5e-06	85.9% (55/64)
(cheD) methyl-accepting chemotaxis protein CheD [peritrichous flagella] [Yersinia enterocolitica subsp. enterocolitica 8081]	7e-18	85.8% (460/536)
(fliP) flagellar biosynthetic protein FliP [Flagella] [Yersinia enterocolitica subsp. enterocolitica 8081]	1e-14	85.8% (133/155)
(mgtB) Mg2+ transport protein [MgtBC] [Salmonella enterica subsp. enterica serovar Typhimurium str. LT2]	3e-13	85.7% (78/91)
(fliI) flagellum-specific ATP synthase FliI [Flagella] [Yersinia enterocolitica subsp. enterocolitica 8081]	3e-13	85.4% (134/157)
(mucP) metalloprotease protease [Alginate regulation] [Pseudomonas aeruginosa PAO1]	1e-06	84.9% (62/73)
(hcp-2) type VI secretion system substrate Hcp-2 [VAS] [Vibrio cholerae O1 biovar El Tor str. N16961]	1e-10	84.6% (209/247)
(pilT) twitching motility protein PilT [Type IV pili] [Neisseria meningitidis MC58]	2e-18	84.6% (121/143)
(htpB) Hsp60, 60K heat shock protein HtpB [Hsp60] [Legionella pneumophila subsp. pneumophila str. Philadelphia 1]	1e-33	84.4% (357/423)
(lpxC) UDP-3-O-(R-3-hydroxymyristoyl)-N-acetylglucosamine deacetylase [LOS] [Haemophilus influenzae Rd KW20]	6e-14	84.3% (91/108)
(gmhA/lpcA) phosphoheptose isomerase [LOS] [Haemophilus influenzae Rd KW20]	1e-29	84.1% (148/176)
(ompA) outer membrane protein A [OmpA] [Escherichia coli O18:K1:H7 str. RS218]	1e-06	83.6% (138/165)
(vipB/mglB) type VI secretion system tubule-forming protein VipB [T6SS] [Vibrio cholerae O1 biovar El Tor str. N16961]	7e-62	83.4% (518/621)
(gspF) general secretion pathway protein F [T2SS] [Shigella dysenteriae Sd197]	2e-18	82.7% (282/341)
(tcpI) toxin co-regulated pilus biosynthesis protein I [TCP] [Vibrio cholerae O1 biovar El Tor str. N16961]	5e-06	82.6% (213/258)
(katB) catalase-peroxidase KatB [KatAB] [Legionella pneumophila subsp. pneumophila str. Philadelphia 1]	2e-39	82.3% (470/571)
(vgrG-2) type VI secretion system substrate VgrG-2 [VAS] [Vibrio cholerae O1 biovar El Tor str. N16961]	8e-22	82.1% (225/274)
(katA) catalase [KatA] [Neisseria meningitidis MC58]	1e-25	82.0% (402/490)
(xcpR) general secretion pathway protein E [xcp secretion system] [Pseudomonas aeruginosa PAO1]	8e-20	82.0% (369/450)
(gspE) general secretion pathway protein E [T2SS] [Shigella dysenteriae Sd197]	1e-48	81.7% (958/1173)
(clpB/vasG) type VI secretion system AAA+ family ATPase [T6SS] [Vibrio cholerae O1 biovar El Tor str. N16961]	3e-17	81.7% (376/460)
(kdsA) 2-dehydro-3-deoxyphosphooctonate aldolase [LOS] [Haemophilus influenzae Rd KW20]	2e-16	81.0% (252/311)
(rfaD) ADP-L-glycero-D-mannoheptose-6-epimerase [LOS] [Haemophilus influenzae Rd KW20]	8e-22	80.8% (181/224)
(gspD) general secretion pathway protein D [T2SS] [Shigella dysenteriae Sd197]	8e-89	80.1% (1867/2331)
(luxS) S-ribosylhomocysteinase [AI-2] [Vibrio cholerae O1 biovar El Tor str. N16961]	4e-25	80.0% (228/285)

## Sheet: zfcc051
Name	E-value	ID
(vasH) type VI secretion system regulatory protein VasH [T6SS] [Vibrio cholerae O1 biovar El Tor str. N16961]	5e-07	97.0% (32/33)
(flhA) flagellar biosynthesis protein FlhA [Flagella] [Yersinia enterocolitica subsp. enterocolitica 8081]	2e-06	96.9% (31/32)
(pvdI) peptide synthase [pyoverdine] [Pseudomonas aeruginosa PAO1]	2e-08	96.2% (100/104)
(pvdJ) pyoverdine biosynthesis protein PvdJ [pyoverdine] [Pseudomonas aeruginosa PAO1]	5e-07	93.2% (69/74)
(fliC) flagellin [Flagella] [Yersinia enterocolitica subsp. enterocolitica 8081]	2e-06	92.5% (37/40)
(gspG) general secretion pathway protein G [T2SS] [Shigella dysenteriae Sd197]	9e-12	91.1% (123/135)
(hcp-2) type VI secretion system substrate Hcp-2 [VAS] [Vibrio cholerae O1 biovar El Tor str. N16961]	6e-32	88.9% (297/334)
(mucD) serine protease MucD precursor [Alginate regulation] [Pseudomonas aeruginosa PAO1]	1e-07	87.9% (51/58)
(IlpA) immunogenic lipoprotein A [IlpA] [Vibrio vulnificus YJ016]	5e-07	87.7% (50/57)
(lpxD) UDP-3-O-(3-hydroxymyristoyl) glucosamine N-acyltransferase [LOS] [Haemophilus influenzae Rd KW20]	9e-10	86.8% (112/129)
(mtrD) multiple transferable resistance system protein MtrD [MtrCDE] [Neisseria meningitidis MC58]	1e-07	86.4% (57/66)
(fliP) flagellar biosynthetic protein FliP [Flagella] [Yersinia enterocolitica subsp. enterocolitica 8081]	4e-15	86.4% (185/214)
(fliQ) flagellar biosynthetic protein FliQ [Flagella] [Pseudomonas aeruginosa PAO1]	2e-08	86.4% (102/118)
(fliN) flagellar motor switch protein FliN [Flagella] [Burkholderia pseudomallei K96243]	2e-16	86.3% (82/95)
(tssH-5/clpV) Clp-type ATPase chaperone protein [T6SS-1] [Burkholderia pseudomallei K96243]	2e-12	86.1% (136/158)
(cheD) methyl-accepting chemotaxis protein CheD [peritrichous flagella] [Yersinia enterocolitica subsp. enterocolitica 8081]	2e-18	85.5% (537/628)
(acfB) accessory colonization factor AcfB [ACF] [Vibrio cholerae O1 biovar El Tor str. N16961]	2e-06	85.3% (58/68)
(htpB) Hsp60, 60K heat shock protein HtpB [Hsp60] [Legionella pneumophila subsp. pneumophila str. Philadelphia 1]	1e-38	84.8% (351/414)
(vgrG-3) type VI secretion system effector VgrG-3 protein, lysozyme-like activity, VgrG-3 and TsaB are a toxin-antitoxin complex [T6SS] [Vibrio cholerae O1 biovar El Tor str. N16961]	2e-10	84.4% (189/224)
(pilA) type 4 fimbrial precursor PilA [Type IV pili] [Pseudomonas aeruginosa PAO1]	2e-08	84.3% (70/83)
(tcpI) toxin co-regulated pilus biosynthesis protein I [TCP] [Vibrio cholerae O1 biovar El Tor str. N16961]	2e-06	84.3% (167/198)
(fliI) flagellum-specific ATP synthase FliI [Flagella] [Yersinia enterocolitica subsp. enterocolitica 8081]	9e-14	84.1% (212/252)
(ompA) outer membrane protein A [OmpA] [Escherichia coli O18:K1:H7 str. RS218]	5e-07	83.6% (138/165)
(vipB/mglB) type VI secretion system tubule-forming protein VipB [T6SS] [Vibrio cholerae O1 biovar El Tor str. N16961]	7e-61	83.0% (464/559)
(pilT) twitching motility protein PilT [Type IV pili] [Pseudomonas aeruginosa PAO1]	7e-22	82.8% (221/267)
(lpxC) UDP-3-O-(R-3-hydroxymyristoyl)-N-acetylglucosamine deacetylase [LOS] [Haemophilus influenzae Rd KW20]	2e-10	82.5% (94/114)
(katB) catalase-peroxidase KatB [KatAB] [Legionella pneumophila subsp. pneumophila str. Philadelphia 1]	1e-40	82.4% (394/478)
(gmhA/lpcA) phosphoheptose isomerase [LOS] [Haemophilus influenzae Rd KW20]	2e-22	82.4% (145/176)
(fliM) flagellar motor switch protein FliM [Flagella] [Pseudomonas aeruginosa PAO1]	2e-12	82.4% (103/125)
(clpB/vasG) type VI secretion system AAA+ family ATPase [T6SS] [Vibrio cholerae O1 biovar El Tor str. N16961]	2e-18	82.1% (432/526)
(mgtB) Mg2+ transport protein [MgtBC] [Salmonella enterica subsp. enterica serovar Typhimurium str. LT2]	2e-14	81.7% (147/180)
(kdsA) 2-dehydro-3-deoxyphosphooctonate aldolase [LOS] [Haemophilus influenzae Rd KW20]	8e-20	81.3% (261/321)
(icl) Isocitrate lyase Icl (isocitrase) (isocitratase) [Isocitrate lyase] [Mycobacterium tuberculosis H37Rv]	5e-07	81.0% (98/121)
(gspD) general secretion pathway protein D [T2SS] [Shigella dysenteriae Sd197]	1e-81	81.0% (1954/2413)
(gspE) general secretion pathway protein E [T2SS] [Shigella dysenteriae Sd197]	2e-39	81.0% (1045/1290)
(xcpR) general secretion pathway protein E [xcp secretion system] [Pseudomonas aeruginosa PAO1]	2e-20	80.6% (450/558)
(katA) catalase [KatA] [Neisseria meningitidis MC58]	2e-24	80.4% (727/904)
(rfaD) ADP-L-glycero-D-mannoheptose-6-epimerase [LOS] [Haemophilus influenzae Rd KW20]	8e-20	80.4% (180/224)
(luxS) S-ribosylhomocysteinase [AI-2] [Vibrio cholerae O1 biovar El Tor str. N16961]	7e-26	80.0% (228/285)
(gspF) general secretion pathway protein F [T2SS] [Shigella dysenteriae Sd197]	7e-22	79.5% (550/692)
(vgrG-2) type VI secretion system substrate VgrG-2 [VAS] [Vibrio cholerae O1 biovar El Tor str. N16961]	2e-14	79.2% (187/236)

## Sheet: FDAARGOS_725
Name	E-value	ID
(flhA) flagellar biosynthesis protein FlhA [Flagella] [Yersinia enterocolitica subsp. enterocolitica 8081]	6e-06	96.9% (31/32)
(cgs) cyclic beta 1-2 glucan synthetase [CG] [Brucella melitensis bv. 1 str. 16M]	6e-08	94.9% (37/39)
(IlpA) immunogenic lipoprotein A [IlpA] [Vibrio vulnificus YJ016]	1e-08	93.2% (41/44)
(rffG) dTDP-glucose 46-dehydratase [LOS] [Haemophilus influenzae Rd KW20]	1e-06	92.7% (38/41)
(fliC) flagellin [Flagella] [Yersinia enterocolitica subsp. enterocolitica 8081]	6e-06	92.5% (37/40)
(gspG) general secretion pathway protein G [T2SS] [Shigella dysenteriae Sd197]	1e-08	90.0% (90/100)
(xcpS) general secretion pathway protein F [xcp secretion system] [Pseudomonas aeruginosa PAO1]	1e-06	88.7% (47/53)
(mucD) serine protease MucD precursor [Alginate regulation] [Pseudomonas aeruginosa PAO1]	3e-07	87.9% (51/58)
(ccmC) cytochrome c-type biogenesis protein CcmC, putative heme lyase for CcmE [CcmC] [Legionella pneumophila subsp. pneumophila str. Philadelphia 1]	6e-06	87.5% (49/56)
(hcp-2) type VI secretion system substrate Hcp-2 [VAS] [Vibrio cholerae O1 biovar El Tor str. N16961]	7e-10	87.4% (111/127)
(lpxD) UDP-3-O-(3-hydroxymyristoyl) glucosamine N-acyltransferase [LOS] [Haemophilus influenzae Rd KW20]	3e-09	86.8% (112/129)
(fliQ) flagellar biosynthetic protein FliQ [Flagella] [Pseudomonas aeruginosa PAO1]	1e-10	86.6% (110/127)
(fliN) flagellar motor switch protein FliN [Flagella] [Burkholderia pseudomallei K96243]	9e-16	86.3% (82/95)
(icl) Isocitrate lyase Icl (isocitrase) (isocitratase) [Isocitrate lyase] [Mycobacterium tuberculosis H37Rv]	6e-06	85.9% (55/64)
(clpC) endopeptidase Clp ATP-binding chain C [ClpC] [Listeria monocytogenes EGD-e]	6e-06	85.8% (109/127)
(acfB) accessory colonization factor AcfB [ACF] [Vibrio cholerae O1 biovar El Tor str. N16961]	6e-06	85.7% (108/126)
(fliI) flagellum-specific ATP synthase FliI [Flagella] [Yersinia enterocolitica subsp. enterocolitica 8081]	4e-13	85.4% (134/157)
(tlpB) membrane-bound chemoreceptor sensing pH and autoinducer-2 [Pse5Ac7Ac] [Helicobacter pylori 26695]	2e-14	85.1% (86/101)
(luxS) S-ribosylhomocysteinase [AI-2] [Vibrio cholerae O1 biovar El Tor str. N16961]	1e-21	85.1% (183/215)
(cheD) methyl-accepting chemotaxis protein CheD [peritrichous flagella] [Yersinia enterocolitica subsp. enterocolitica 8081]	9e-18	84.6% (429/507)
(fliP) flagellar biosynthetic protein FliP [Flagella] [Pseudomonas aeruginosa PAO1]	2e-35	84.4% (282/334)
(lpxC) UDP-3-O-(R-3-hydroxymyristoyl)-N-acetylglucosamine deacetylase [LOS] [Haemophilus influenzae Rd KW20]	8e-14	84.3% (91/108)
(tcpI) toxin co-regulated pilus biosynthesis protein I [TCP] [Vibrio cholerae O1 biovar El Tor str. N16961]	1e-08	84.1% (132/157)
(cheV3) chemotaxis coupling protein CheV3 [Pse5Ac7Ac] [Helicobacter pylori 26695]	7e-10	83.7% (82/98)
(ompA) outer membrane protein A [OmpA] [Escherichia coli O18:K1:H7 str. RS218]	1e-06	83.6% (138/165)
(vgrG-2) type VI secretion system substrate VgrG-2 [VAS] [Vibrio cholerae O1 biovar El Tor str. N16961]	3e-11	83.4% (166/199)
(gmhA/lpcA) phosphoheptose isomerase [LOS] [Haemophilus influenzae Rd KW20]	3e-24	83.3% (200/240)
(htpB) Hsp60, 60K heat shock protein HtpB [Hsp60] [Legionella pneumophila subsp. pneumophila str. Philadelphia 1]	4e-32	82.5% (506/613)
(pilT) twitching motility protein PilT [Type IV pili] [Pseudomonas aeruginosa PAO1]	5e-23	82.2% (245/298)
(katB) catalase-peroxidase KatB [KatAB] [Legionella pneumophila subsp. pneumophila str. Philadelphia 1]	1e-36	82.0% (392/478)
(fliM) flagellar motor switch protein FliM [Flagella] [Pseudomonas aeruginosa PAO1]	3e-07	81.6% (93/114)
(gspD) general secretion pathway protein D [T2SS] [Shigella dysenteriae Sd197]	2e-75	81.2% (1784/2198)
(xcpR) general secretion pathway protein E [xcp secretion system] [Pseudomonas aeruginosa PAO1]	6e-25	81.1% (339/418)
(kdsA) 2-dehydro-3-deoxyphosphooctonate aldolase [LOS] [Haemophilus influenzae Rd KW20]	2e-16	81.1% (236/291)
(mgtB) Mg2+ transport protein [MgtBC] [Salmonella enterica subsp. enterica serovar Typhimurium str. LT2]	9e-16	81.0% (145/179)
(gspF) general secretion pathway protein F [T2SS] [Shigella dysenteriae Sd197]	1e-10	80.7% (230/285)
(rfaD) ADP-L-glycero-D-mannoheptose-6-epimerase [LOS] [Haemophilus influenzae Rd KW20]	5e-19	80.7% (171/212)
(fliR) flagellar biosynthetic protein FliR [Flagella] [Pseudomonas aeruginosa PAO1]	1e-06	80.3% (110/137)
(gspE) general secretion pathway protein E [T2SS] [Shigella dysenteriae Sd197]	5e-38	79.7% (999/1254)
(katA) catalase [KatA] [Neisseria meningitidis MC58]	5e-23	79.2% (369/466)

[truncated: 10 more sheets: Colony20, Colony 13, NCTC10363, MD22D9, GT4,  NCTC10364, GN7, NCTC10360, P5462 , 302-73]
