# Supplementary figures and images for: Description of a Novel Fish Pathogen, Plesiomonas shigelloides subsp. Oncorhynchi, Isolated From Rainbow Trout (Oncorhynchus mykiss): First Genome Analysis and Comparative Genomics
Source: Preprints.org preprint supplement (doi:10.20944/preprints202303.0175.v1), 2023-03-09

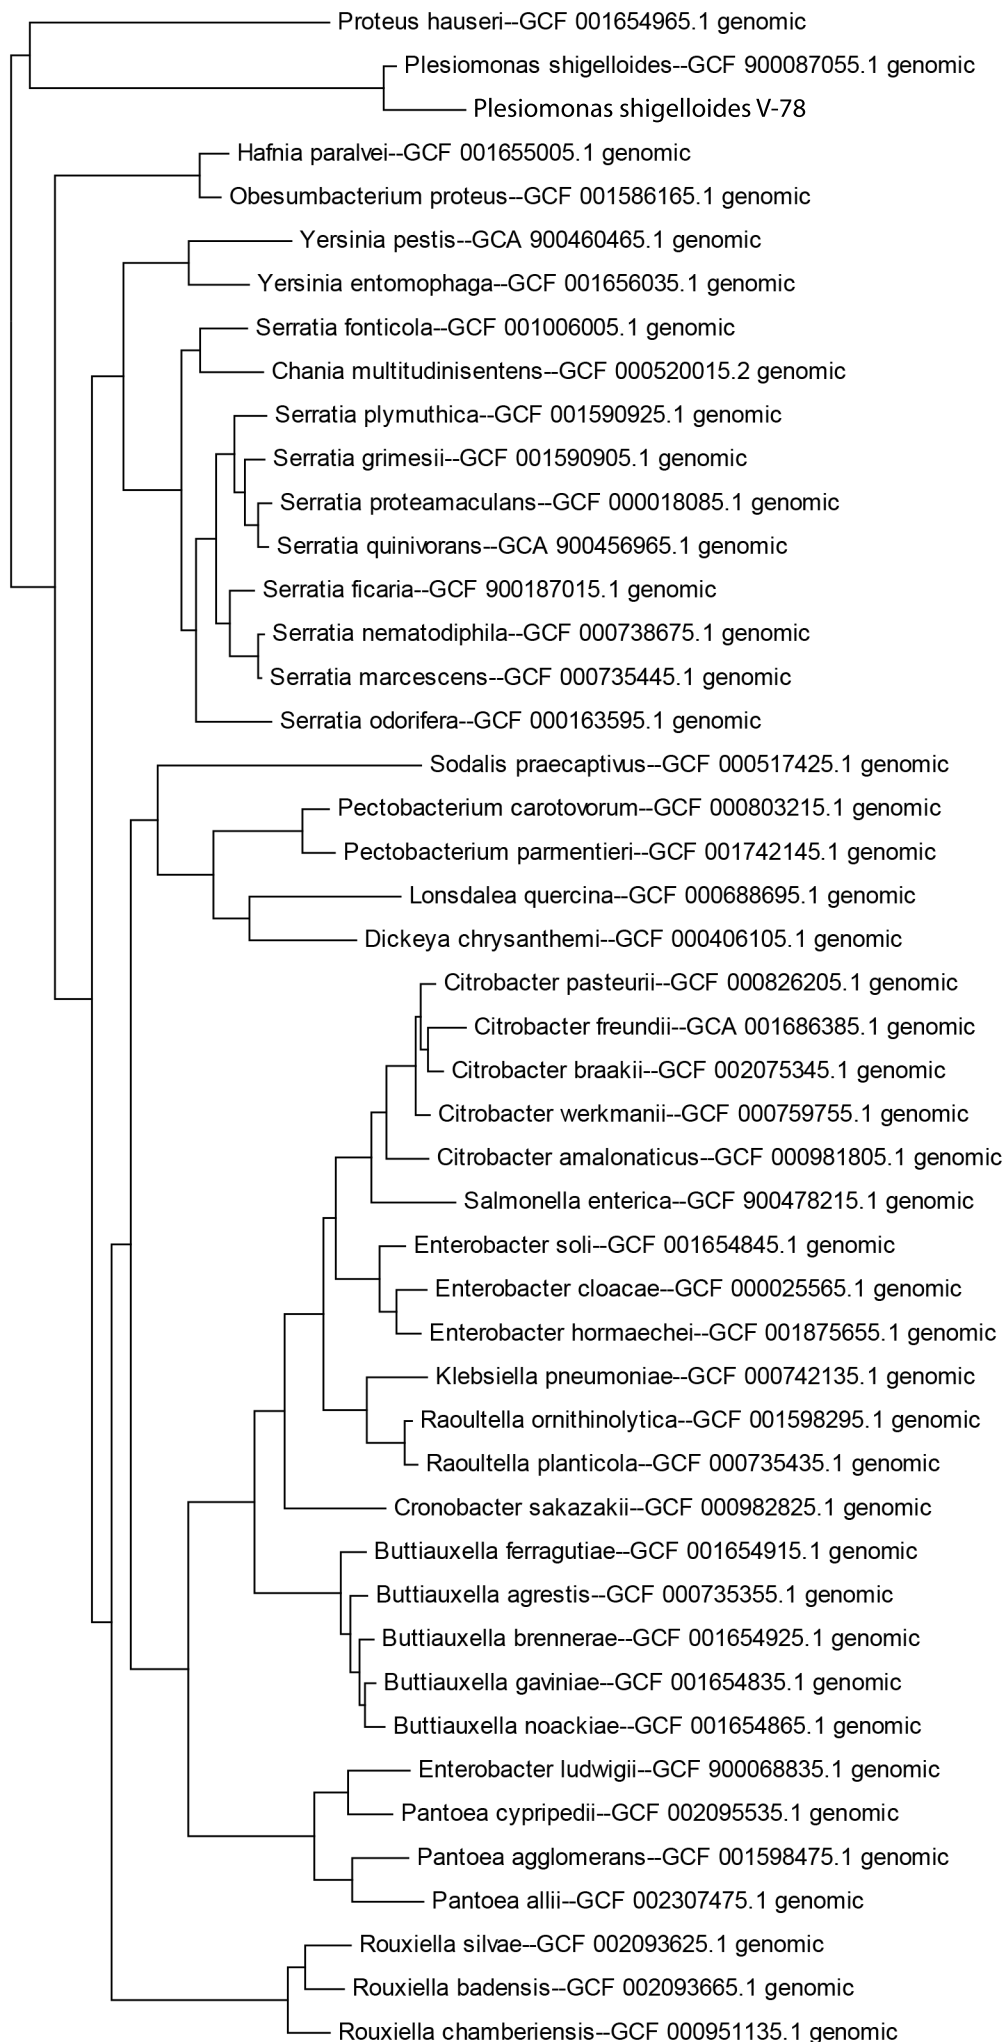

0.050

Supplement: Supplementary file 1 [file supplementary]
